# Supplementary material for: Unraveling the atomic structure and dissociation of interfacial water on anatase TiO2(101) under ambient conditions with solid-state NMR spectroscopy
Source: Royal Society of Chemistry journal article supplement (doi:10.1039/d4sc02768j), 2024-01-01
Supplement: d4sc02768j1.pdf [file d4sc02768j1.pdf]

## ***Supplementary Information for***

# **Unraveling the atomic structure and dissociation of interfacial water on anatase TiO<sub>2</sub> (101) under ambient conditions with solid-state NMR spectroscopy†**

Longxiao Yang,<sup>‡a</sup> Min Huang,<sup>‡b</sup> Ningdong Feng,<sup>\*a</sup> Meng Wang,<sup>c</sup> Jun Xu,<sup>a</sup> Ying Jiang,<sup>d</sup> Ding Ma,<sup>\*c</sup> Feng Deng<sup>\*a</sup>

<sup>a</sup>State Key Laboratory of Magnetic Resonance and Atomic and Molecular Physics, National Center for Magnetic Resonance in Wuhan, Wuhan Institute of Physics and Mathematics, Innovation Academy for Precision Measurement Science and Technology, Chinese Academy of Sciences, Wuhan 430071; University of Chinese Academy of Sciences, Beijing 100049, P. R. China.  
[ningdong.feng@wipm.ac.cn](mailto:ningdong.feng@wipm.ac.cn), [dengf@wipm.ac.cn](mailto:dengf@wipm.ac.cn)

<sup>b</sup>School of Physics, Hubei University, Wuhan 430062, P. R. China.

<sup>c</sup>Beijing National Laboratory for Molecular Sciences, New Cornerstone Science Laboratory, College of Chemistry and Molecular Engineering, Peking University, Beijing, China. [dma@pku.edu.cn](mailto:dma@pku.edu.cn)

<sup>d</sup>International Center for Quantum Materials, School of Physics, Peking University, Beijing, P. R. China.

†Electronic supplementary information (ESI) available.

‡These authors contributed equally to this work.

## Experimental Sections

**Sample Preparation.** The anatase TiO<sub>2</sub> samples with predominantly exposed (101) facets were prepared according to previous report <sup>1,2</sup>. For the preparation of Ti(OH)<sub>4</sub> precursor, 6.6 mL of TiCl<sub>4</sub> was added to aqueous HCl (0.43 mol/L) drop by drop under strong stirring in an ice bath to obtain an aqueous TiCl<sub>4</sub>. This aqueous TiCl<sub>4</sub> was then added to aqueous NH<sub>3</sub>·H<sub>2</sub>O (5.5 wt.%) drop by drop under stirring. White Ti(OH)<sub>4</sub> precipitate could be formed during the process. Afterward, the aqueous NH<sub>3</sub>·H<sub>2</sub>O (4.0 wt.%) was added to adjust the pH value to 6 – 7. After aging at room temperature for 2 h, the suspension was centrifuged, and the precipitate was washed with distilled water for three times and absolute ethanol for one time.

4.0 g the fresh Ti(OH)<sub>4</sub> precursor was first dispersed in the mixture of 30 mL deionized water and 30 ml isopropanol. After stirring and ultrasonic treatment, the suspension was transferred to a 100 mL Teflon-lined autoclave and heated for 15 h at 180 °C. The products were collected by centrifugation and washed with NaOH solution (0.1 M) and absolute ethanol for five times respectively. To remove the Cl<sup>-</sup> and N attached on the surface, the product was dispersed in 200 mL NaOH solution (0.1 M) with magnetic stirring for 12 h. Finally, the white TiO<sub>2</sub> sample is obtained by washing with distilled water until the pH reaches 6 – 7 and drying at 60 °C for 12 h.

**<sup>17</sup>O enrichment.** 100 mg TiO<sub>2</sub> sample was enriched by 360 μmol of H<sub>2</sub><sup>17</sup>O (Cambridge Isotope Laboratories, 90%) at room temperature for 2 h, and then the <sup>17</sup>O-enriched TiO<sub>2</sub> was dehydrated at 160 °C. Different amount of H<sub>2</sub><sup>17</sup>O was

introduced onto the dehydrated TiO<sub>2</sub> catalyst (100 mg) in a glass tube connecting to a vacuum line at the liquid N<sub>2</sub> temperature, and then the glass tube was sealed off. The glass tube was placed at room temperature for 2 h to equilibrate the <sup>17</sup>O enrichment process. Prior to the NMR experiments, the <sup>17</sup>O enriched samples with or without loaded H<sub>2</sub><sup>17</sup>O were transferred into a NMR rotor in the glove box.

**<sup>2</sup>H enrichment.** The dehydrated <sup>2</sup>H-enriched TiO<sub>2</sub> (100 mg) was prepared by exchanging TiO<sub>2</sub> with 470 μmol of <sup>2</sup>H<sub>2</sub>O (Sigma-Aldrich, 99.9%) at room temperature for 2 h, and then the <sup>2</sup>H-enriched sample was dehydrated at 160 °C. The dehydrated <sup>2</sup>H-enriched TiO<sub>2</sub> was then loaded with different amount (0.3 – 4.7 mmol/g) of <sup>2</sup>H<sub>2</sub>O.

**Characterization.** X-ray diffraction patterns (XRD) of the samples were acquired on a X'PERT<sup>3</sup> POWDER with Cu radiation (λ = 0.15418 nm). The morphology of TiO<sub>2</sub> was characterized by transmission electron microscopy (TEM) on a Tecnai F30 at an accelerating voltage of 300 KV. Nitrogen adsorption/desorption isotherm measurements were conducted at an ASAP 2460 for the BET area. X-ray photoelectron spectroscopy (Thermo Escalab 250Xi, Al Ka irradiation, XPS) was adopted to detect the residue of Cl<sup>-</sup>, N impurities on the TiO<sub>2</sub> surface. The C 1s peak (284.6 eV) arising from adventitious carbon was chosen as the reference of the binding energy.

<sup>17</sup>O MAS NMR experiments were conducted at 11.7 T (<sup>17</sup>O Larmor frequency of 67.8MHz) on a Bruker-Advance III 500 spectrometer using a 4 mm double-resonance probe. The 1D <sup>17</sup>O MAS NMR spectra were recorded by using a π/12 pulse width of 0.3 μs, a repetition time of 0.5 s, a magic angle spinning

rate of 13.5 kHz, and 600000 scans accumulations. 2D  $^{17}\text{O}$  3Q MAS NMR experiments were carried out using Z-fliter sequence with a pulse delay of 0.5 s and a magic angle spinning rate of 13.5 kHz. The increment interval in the indirect dimension was set to 52.59  $\mu\text{s}$ , and 32  $t_1$  increments and 36000 scans accumulations for each  $t_1$  increment were used in the NMR experiments. The total time for acquiring a 1D  $^{17}\text{O}$  MAS spectrum is ca. three-four days and that for acquiring a 2D  $^{17}\text{O}$  3Q MAS NMR spectrum is up to six days. 2D  $^1\text{H}\{^{17}\text{O}\}$  J-HMQC spectra were collected at a magic angle spinning speed of 13.5 kHz with a recycle delay of 1.5 s. The increment interval in the indirect dimension was set to 74.07  $\mu\text{s}$ , and 80  $t_1$  increments were used in the NMR experiments. A total of 128, 512, 128 scans were collected respectively for the 2D  $^1\text{H}\{^{17}\text{O}\}$  J-HMQC spectra in the  $^{17}\text{O}$  chemical shift range of -50 – 40, 110 – 190, 590 – 710 ppm. The total time for acquiring a 2D  $^1\text{H}\{^{17}\text{O}\}$  J-HMQC spectrum is 4 – 16 hours.

The 1D  $^{17}\text{O}$  MAS NMR spectra were also recorded at 18.8 T ( $^{17}\text{O}$  Larmor frequency of 108.5 MHz) on a Bruker-Advance III 800 spectrometer using a 1.9 mm double-resonance probe. A  $\pi/2$  pulse width of 2.5  $\mu\text{s}$  and a repetition time of 1 s were used to collect the 1D  $^{17}\text{O}$  MAS NMR spectra at a spinning speed of 35 kHz.

Variable-temperature static  $^2\text{H}$  NMR experiments were performed on a Bruker Avance III 400 MHz DNP spectrometer and a double-resonance 1.9 mm probe. A solid echo pulse sequence [ $\pi/2$  -  $\tau$  -  $\pi/2$ -  $\tau$  - acquire] was used to acquire static  $^2\text{H}$  NMR spectra, in which echo delay,  $\pi/2$  pulse length and recycle

delay were 30  $\mu$ s, 2.9  $\mu$ s and 2 s, respectively. Deconvolution of the  $^2\text{H}$  NMR spectra was conducted using DMFIT software.

$^2\text{H}$  MAS NMR experiments were performed on a Bruker-Advance III 500 spectrometer with a double-resonance 4.0 mm probe. A  $\pi/2$  pulse width of 5  $\mu$ s and a recycle delay of 4 s were used to collect the 1D  $^2\text{H}$  MAS NMR spectra at a spinning speed of 10 kHz.

**Theoretical calculations.** Density functional theory (DFT) calculations were performed by using Vienna Ab initio Simulation Package (VASP) computer package with the Perdew-Burke-Ernzerhof (PBE) generalized gradient corrected approximation (GGA) for the exchange-correlation function <sup>3,4</sup>. Projector-augmented wave (PAW) potentials were used to take into account the electron-ion interaction, and the wave function was described with a plane wave basis set of 500 eV. Similar to previous study which showed standard DFT can give reliable structural information, we used standard DFT method to do all the calculations <sup>5</sup>. To make our calculation results more reliable, we used the experimental values ( $a = 3.78 \text{ \AA}$  and  $c = 9.50 \text{ \AA}$ ) for the lattice constant of bulk anatase  $\text{TiO}_2$  in our calculations <sup>6</sup>. The anatase  $\text{TiO}_2$  (101) surfaces were modeled by (2 $\times$ 2) surface slabs with 24 atomic layers and vacuum thickness of 15  $\text{\AA}$  to maintain trivial fluctuations of chemical shift values in their middle layers. The chemical shifts of O were calculated by using the linear response method. The k-point meshes employed in the calculations were generated according to the Monkhorst-Pack scheme <sup>7</sup>. The resulting Brillouin-zone sampling used for the supercells was equivalent to the one obtained with (4 $\times$ 4 $\times$ 1) grids for the primitive

(1×1) slabs of the surface. Spin polarization was included in the calculations. All of the atoms were allowed to relax during structure optimization until the change of the total energy was less than  $1 \times 10^{-5} \text{eV}$  and all the forces on each atom were smaller than  $0.01 \text{ eV/\AA}$ .

The isotropic chemical shift ( $\delta$ ) can be computed as  $\delta = \bar{\delta}_{cal} + \bar{\delta}_{ref}$  where  $\bar{\delta}_{cal}$  is the chemical shift calculated by VASP,  $\bar{\delta}_{ref}$  is the reference chemical shift. The  $\bar{\delta}_{ref}$  for each model was determined by aligning the average  $\bar{\delta}_{cal}$  of middle four layers to the experimental  $\bar{\delta}_{iso}$  of bulk  $\text{O}_{3\text{C}}$  (561 ppm).

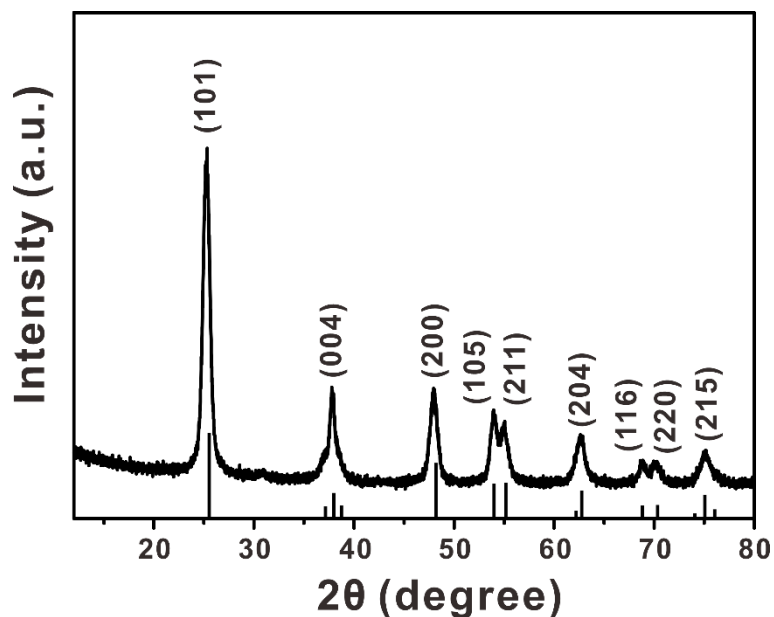

**Figure S1.** XRD patterns and standard PDF card of the anatase  $\text{TiO}_2$  sample.

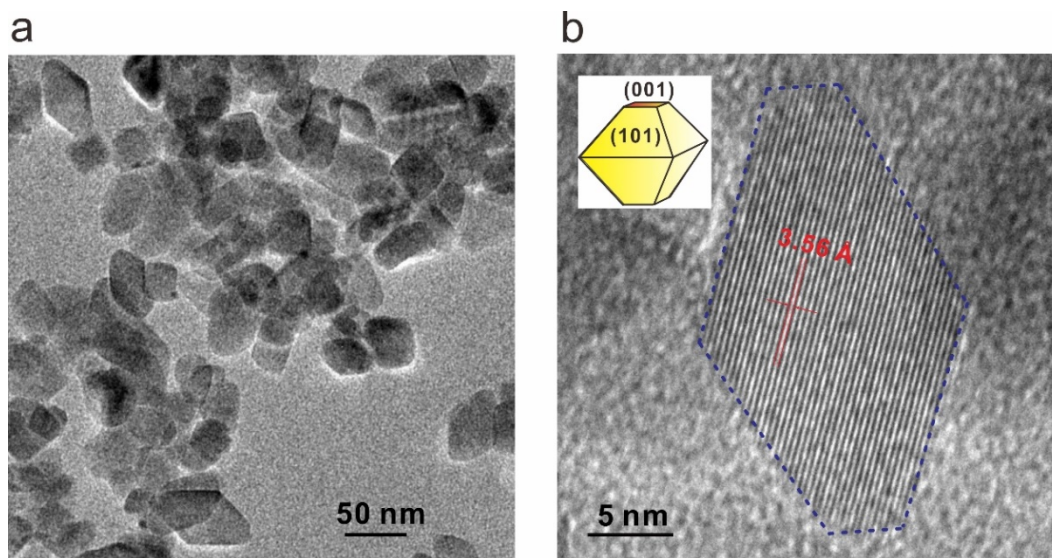

**Figure S2.** (a) Low magnification and (b) high resolution TEM images of the  $\text{TiO}_2$  sample. Inset in b shows the schematic diagram of the  $\text{TiO}_2$  nanoparticle. The TEM results indicate that the  $\text{TiO}_2$  sample exhibits an octahedral morphology with an average size of 20 nm. The lattice spacing parallel to the lateral facets is 3.56 Å, corresponding to the (101) facet of anatase  $\text{TiO}_2$ , and the percentage of the dominant facet is about 95%, which is the most frequently exposed surface with the lowest energy<sup>8,9</sup>.

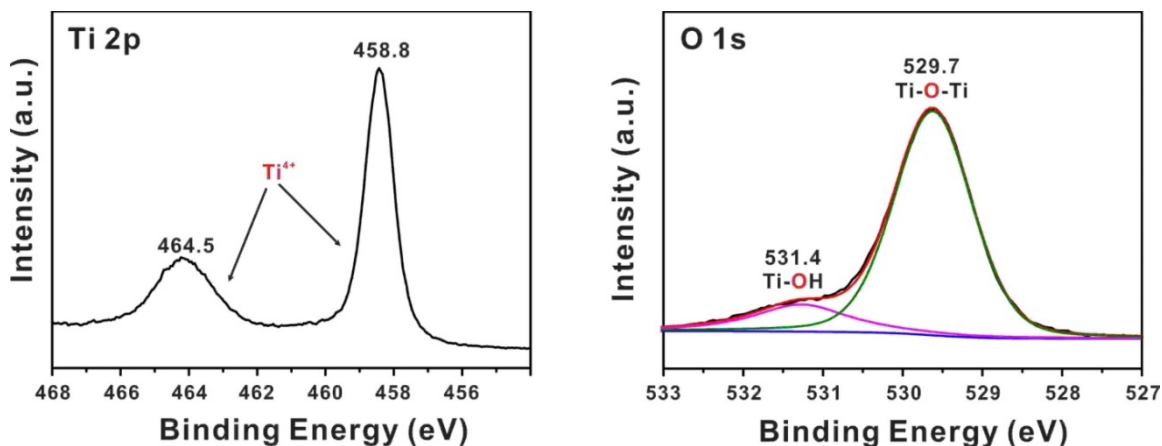

**Figure S3.** Ti  $2p$ , and O  $1s$  XPS spectra of the  $\text{TiO}_2$  sample. According to the XPS results, titanium atoms exist in the form of  $\text{Ti}^{4+}$ -O bonds as confirmed by the Ti  $2p_{3/2}$  and  $2p_{1/2}$  XPS peaks at 458.8 and 464.5 eV, and the O  $1s$  XPS spectra shows two peaks at 529.7 and 531.4 eV, due to lattice oxygen in Ti-O-Ti bonds and OH groups, respectively<sup>10</sup>.

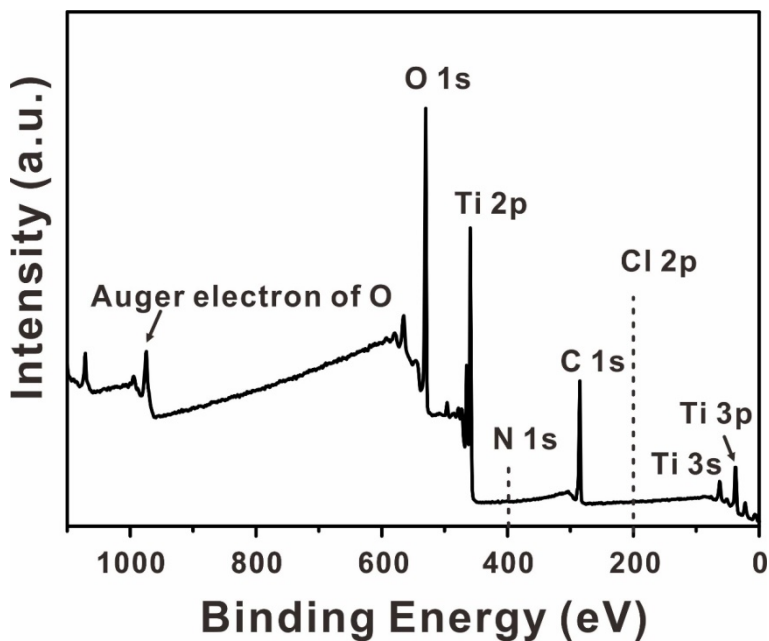

**Figure S4.** XPS patterns of the  $\text{TiO}_2$  sample.  $\text{Cl}^-$  (200 eV) and N (400 eV) species are not observed on the surface, indicating the absence of chlorine and nitrogen species on the  $\text{TiO}_2$  surface.



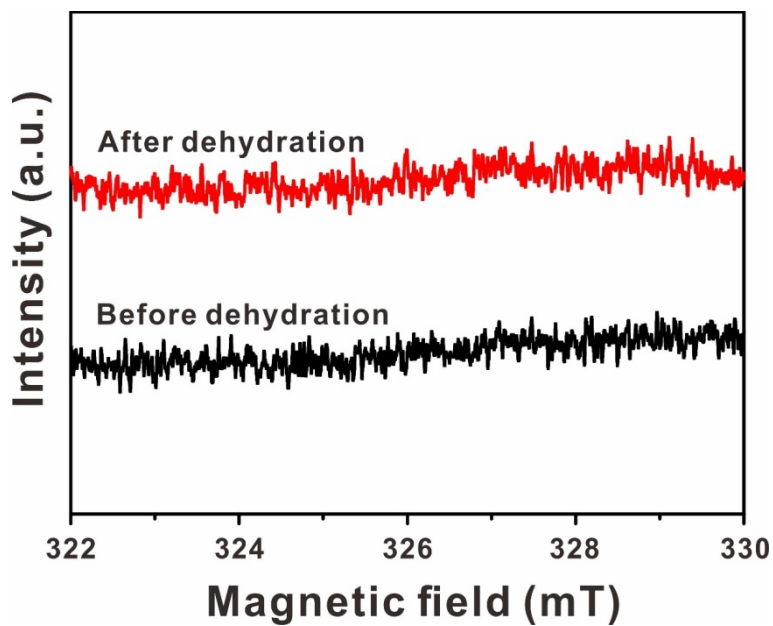

**Figure S5.** ESR spectra (acquired at liquid nitrogen temperature) of the  $\text{TiO}_2$  sample before and after dehydration at  $160^\circ\text{C}$ .

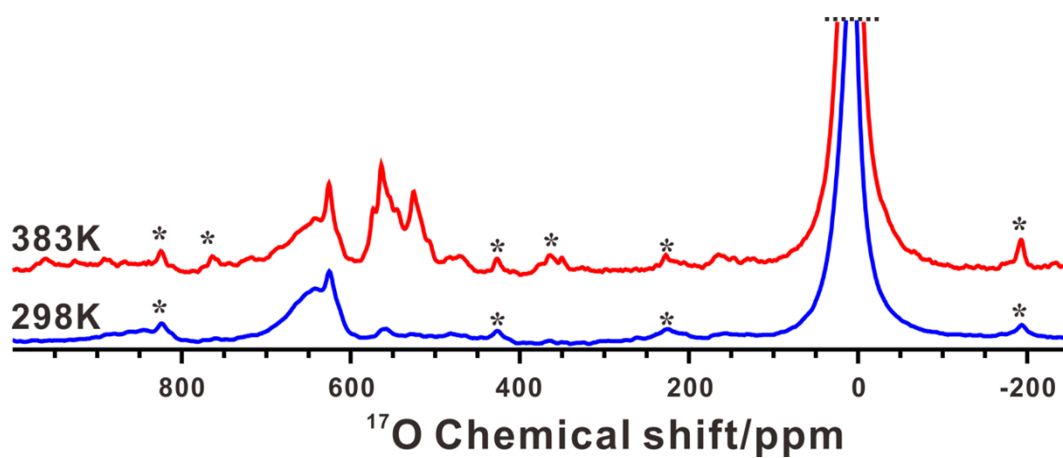

**Figure S6.** 1D  $^{17}\text{O}$  MAS NMR spectra of dehydrated  $^{17}\text{O}$ -enriched  $\text{TiO}_2$  loaded with  $3.1\text{ mmol/g H}_2^{17}\text{O}$  at 298 K and 383 K, acquired at magnetic field of 11.7 T.

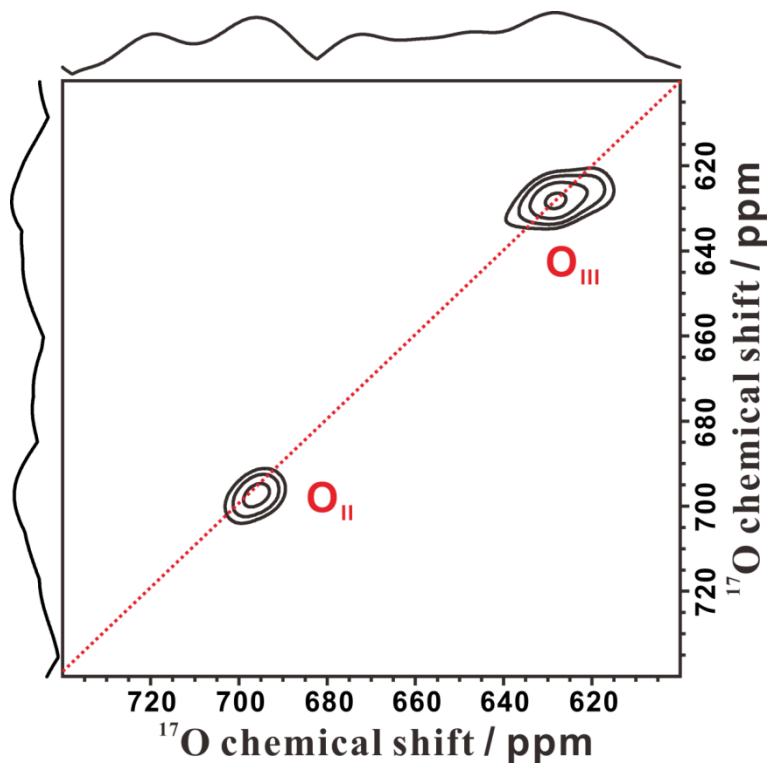

**Figure S7.** 2D  $^{17}\text{O}$  3Q MAS NMR spectrum of dehydrated  $^{17}\text{O}$ -enriched  $\text{TiO}_2$  with 0.3 mmol/g  $\text{H}_2^{17}\text{O}$  loading, acquired at magnetic field of 11.7 T.

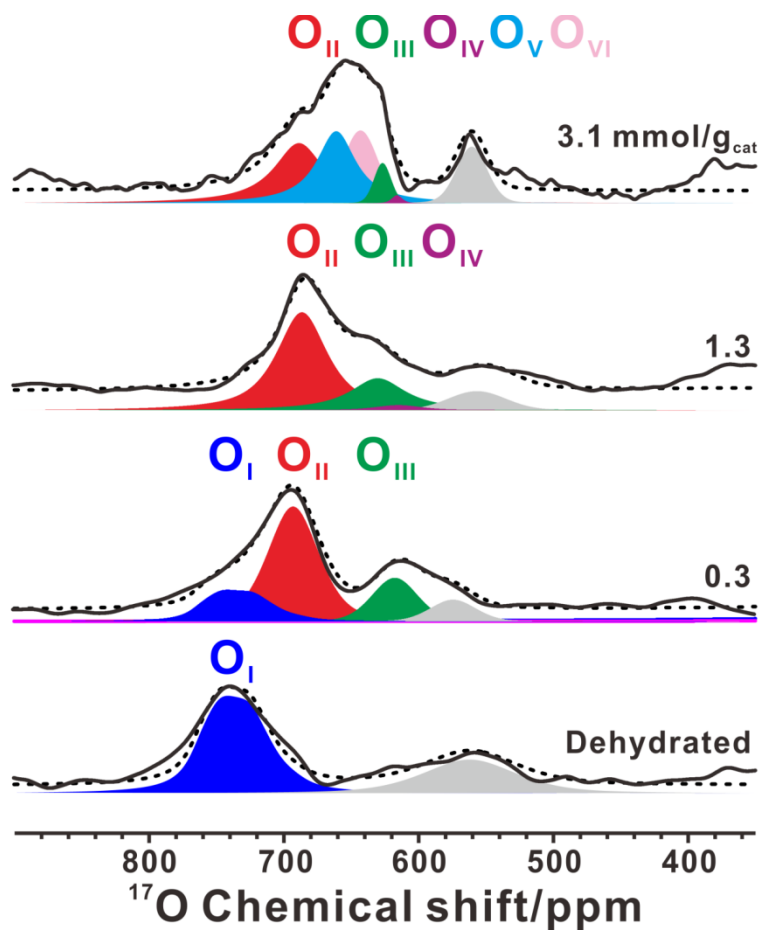

**Figure S8.** 1D  $^{17}\text{O}$  MAS NMR spectra of dehydrated  $^{17}\text{O}$ -enriched  $\text{TiO}_2$  samples with  $\text{H}_2^{17}\text{O}$  loading from 0 to 3.1 mmol/g, acquired at magnetic field of 18.7 T. The signal (gray) at 500 – 600 ppm is due to the bulk oxygen species.

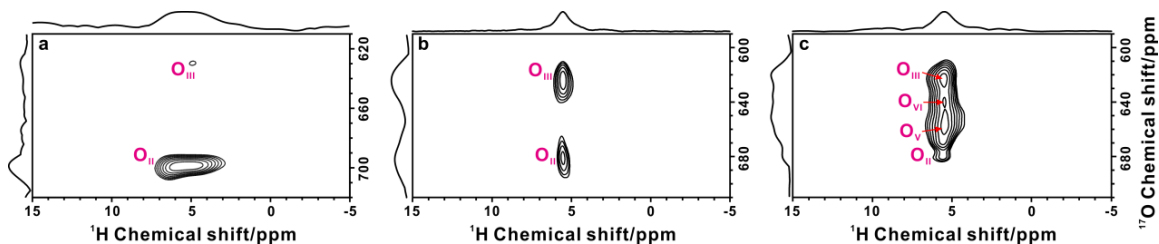

**Figure S9.** 2D  $^1\text{H}\{^{17}\text{O}\}$  J-HMQC NMR spectra of dehydrated  $^{17}\text{O}$ -enriched  $\text{TiO}_2$  samples with (a) 0.5, (b) 1.3 and (c) 3.1 mmol/g  $\text{H}_2^{17}\text{O}$  loading. When the  $\text{H}_2^{17}\text{O}$  loading is 0.5 mmol/g, two correlations are visible between the  $^1\text{H}$  signal (at 5.4 ppm) of molecular  $\text{H}_2\text{O}$  and the  $^{17}\text{O}$  signals of  $\text{O}_{\text{II}}$  (at 700 ppm) and  $\text{O}_{\text{III}}$  (at 628 ppm) sites (Figure S9a). When the  $\text{H}_2^{17}\text{O}$  loading is 1.3 mmol/g, the  $^1\text{H}$  signal (at 5.4 ppm) of molecular  $\text{H}_2\text{O}$  also interacts with the two types of surface  $\text{O}_{2\text{C}}$  sites (that is  $\text{O}_{\text{II}}$  and  $\text{O}_{\text{III}}$ , Figure S9b). With the increase of  $\text{H}_2\text{O}$  loading to 3.1 mmol/g, four correlations are evident between the  $^1\text{H}$  signal (at 5.4 ppm) of molecular  $\text{H}_2\text{O}$  and the  $^{17}\text{O}$  signals of  $\text{O}_{\text{II}}$  (at 678 ppm),  $\text{O}_{\text{III}}$  (at 628 ppm),  $\text{O}_{\text{V}}$  (at 658 ppm), and  $\text{O}_{\text{VI}}$  (at 640 ppm) sites (Figure S9c). Note that there is no correlation observed between these  $\text{O}_{2\text{C}}$  sites and surface OH groups. Thus, the formation of  $\text{O}_{\text{II}} - \text{O}_{\text{VI}}$  sites is only associated with interaction between  $\text{O}_{\text{I}}$  (the bare  $\text{O}_{2\text{C}}$  site) and molecular  $\text{H}_2\text{O}$ , and has nothing to do with surface OH groups. Additionally, the correlation signal between the  $^1\text{H}$  signal (at 5.4 ppm) of adsorbed  $\text{H}_2\text{O}$  and the  $^{17}\text{O}$  signal (at 615 ppm) of  $\text{O}_{\text{IV}}$  is not observable, probably due to its low amount and high mobility.

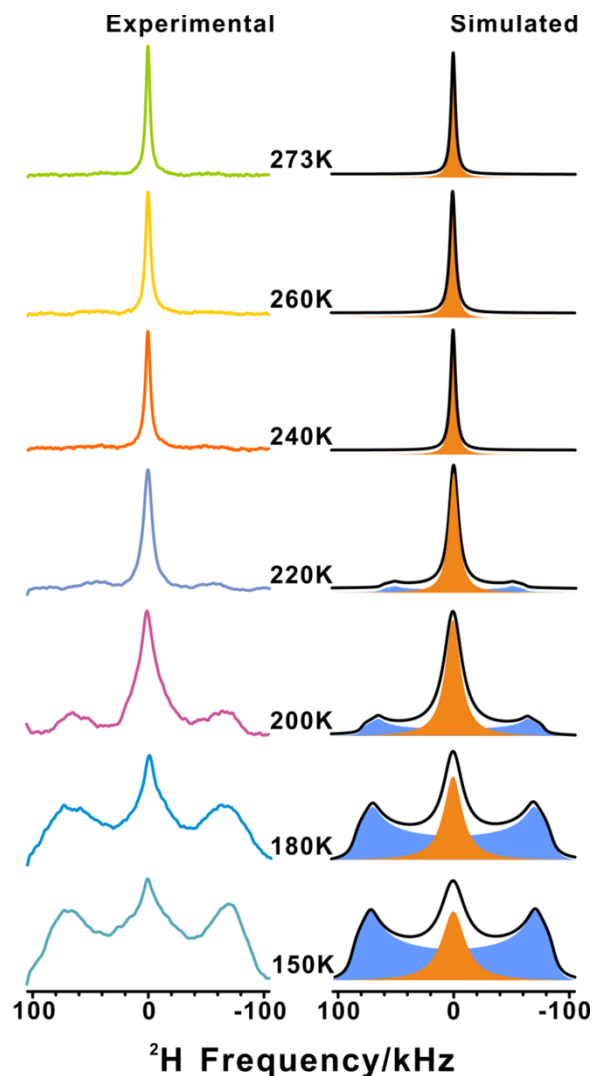

**Figure S10.** Experimental (left) and simulated (right) static  $^2\text{H}$  NMR spectra of  $\text{TiO}_2$  with 1.3 mmol/g  $\text{D}_2\text{O}$  loading, acquired at variable temperature. Two peaks with different lineshape are evident at low temperature (150 – 220 K), confirming the existence of two types of adsorbed  $\text{D}_2\text{O}$  (that is chemisorbed and physisorbed  $\text{D}_2\text{O}$ ). According to the 2D  $^1\text{H}\{^{17}\text{O}\}$  J-HMQC NMR experiments, the chemisorbed  $\text{D}_2\text{O}$  not only interacts with two types of surface hydroxyl groups (Figure 2 in main text) and  $\text{O}_{2\text{C}}$  sites (Figure S9), but also bonds to  $\text{Ti}_{5\text{C}}$  site ( $\text{D}_2\text{O}-\text{Ti}_{5\text{C}}$ ) on the  $\text{TiO}_2$  surface, forming a relatively rigid structure. The peak of the chemisorbed  $\text{D}_2\text{O}$  shows a broad  $^2\text{H}$  quadrupolar pattern at 150 K, and its NMR parameters ( $\delta_{\text{iso}}$ ,  $C_Q$ , and  $\eta$ ) are listed in Table S4. While the physisorbed  $\text{D}_2\text{O}$  only interacts with the chemisorbed  $\text{D}_2\text{O}$  and terminal hydroxyl group, and has relatively high mobility, leading to a narrow peak with Gaussian lineshape. When the temperature increases from 150 K to 220 K, the  $^2\text{H}$  quadrupolar pattern gradually disappears, which can be ascribed to the fast exchange between chemisorbed and physisorbed  $\text{D}_2\text{O}$  molecules.

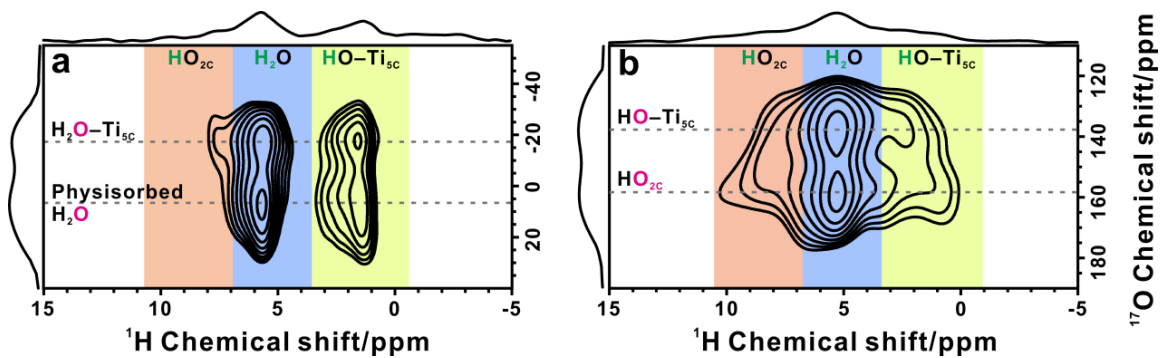

**Figure S11.** 2D  $^1\text{H}\{^{17}\text{O}\}$  J-HMQC NMR spectra (a, b) of dehydrated  $^{17}\text{O}$ -enriched  $\text{TiO}_2$  with 1.3 mmol/g  $\text{H}_2^{17}\text{O}$  loading in different  $^{17}\text{O}$  chemical shift range.

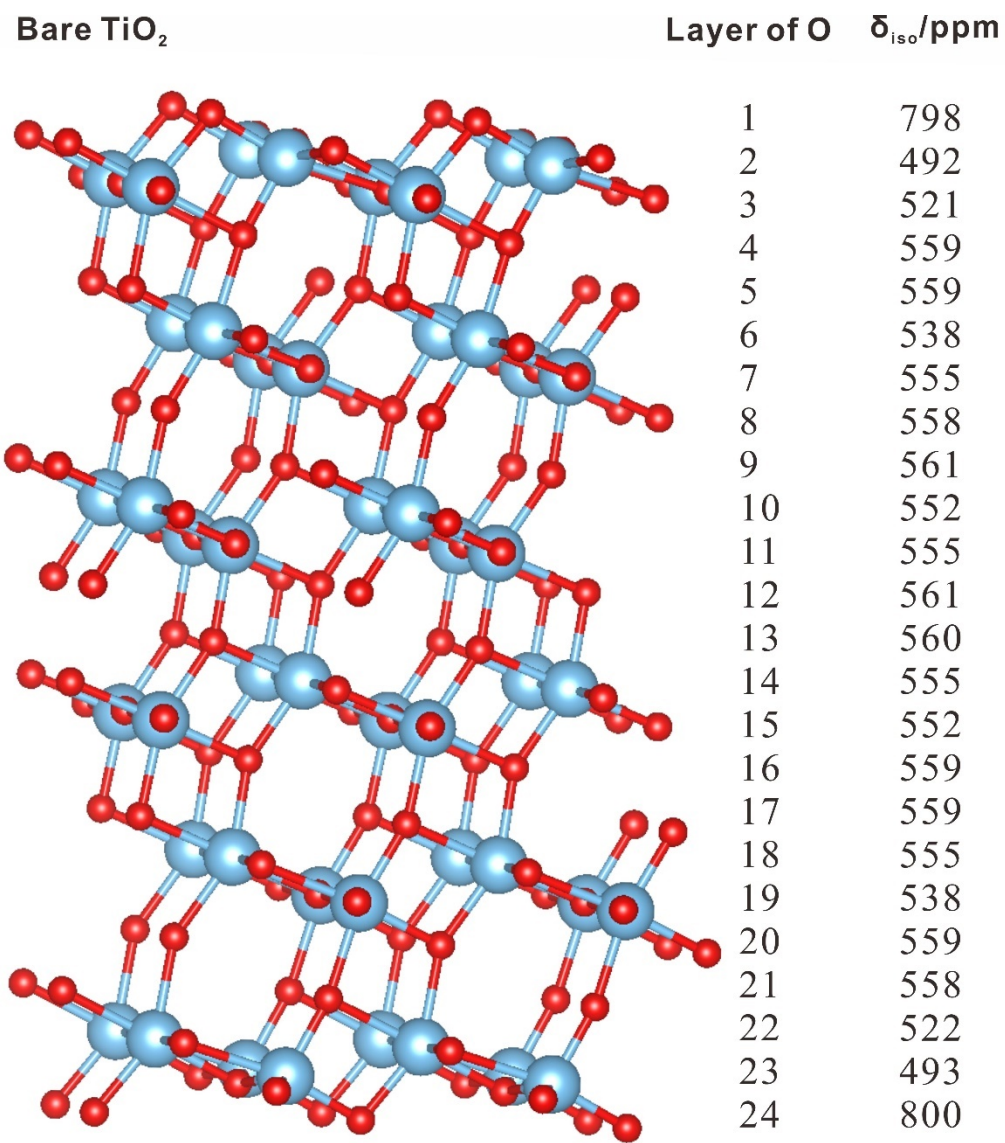

**Figure S12.** Calculated structure of the bare TiO<sub>2</sub> (101) facet. Isotropic chemical shifts  $\delta_{iso}$  of the oxygen sites in each layer are listed, for which  $\delta_{ref} = 133$ . Titanium and oxygen atoms are plotted in blue (Ti) and red (O).

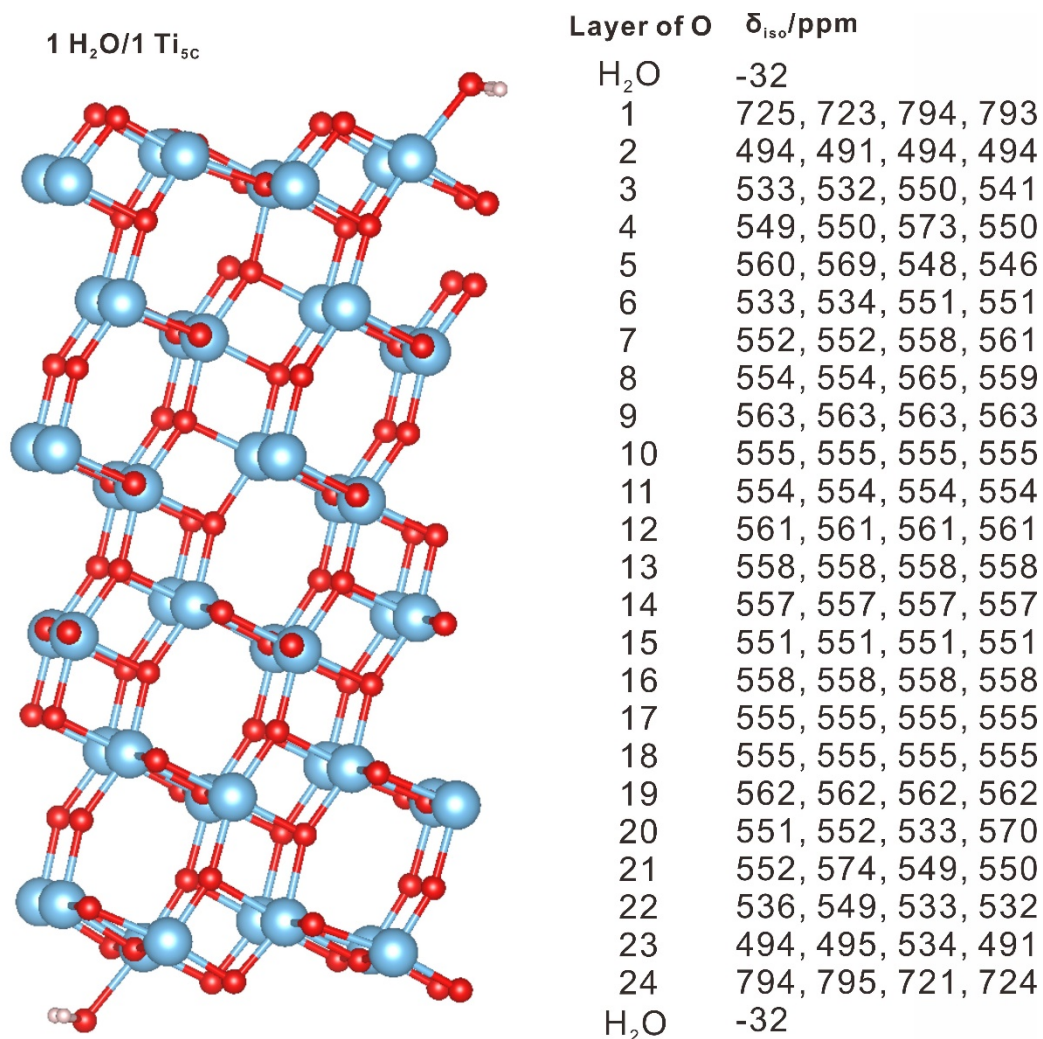

**Figure S13.** Calculated structure of the TiO<sub>2</sub> (101) facet with adsorbed water molecules. In this model, one water molecule is chemisorbed on one surface Ti<sub>5C</sub> site. This structure is denoted as 1H<sub>2</sub>O/1Ti<sub>5C</sub> in the text. Isotropic chemical shifts  $\delta_{iso}$  of the oxygen sites in each layer are listed, for which  $\delta_{ref} = 135$ . Titanium, oxygen and hydrogen atoms are plotted in blue (Ti), red (O) and pink (H).



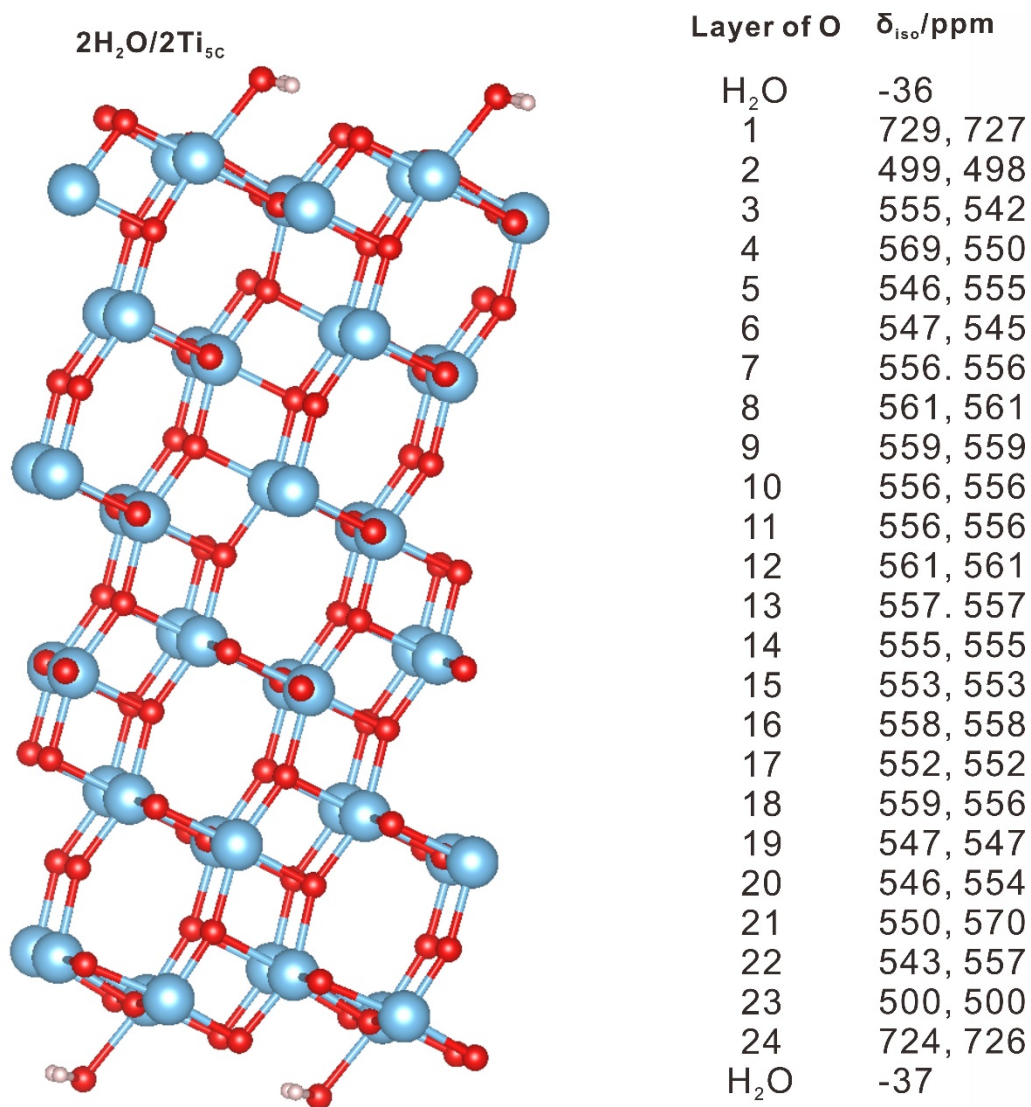

**Figure S14.** Calculated structure of the  $\text{TiO}_2$  (101) facet with adsorbed water molecules. In this model, two water molecules are chemisorbed on two surface  $\text{Ti}_{5\text{C}}$  site. This structure is denoted as  $2\text{H}_2\text{O}/2\text{Ti}_{5\text{C}}$  in the text. Isotropic chemical shifts  $\delta_{\text{iso}}$  of the oxygen sites in each layer are listed, for which  $\delta_{\text{ref}} = 135$ . Titanium, oxygen and hydrogen atoms are plotted in blue (Ti), red (O) and pink (H).

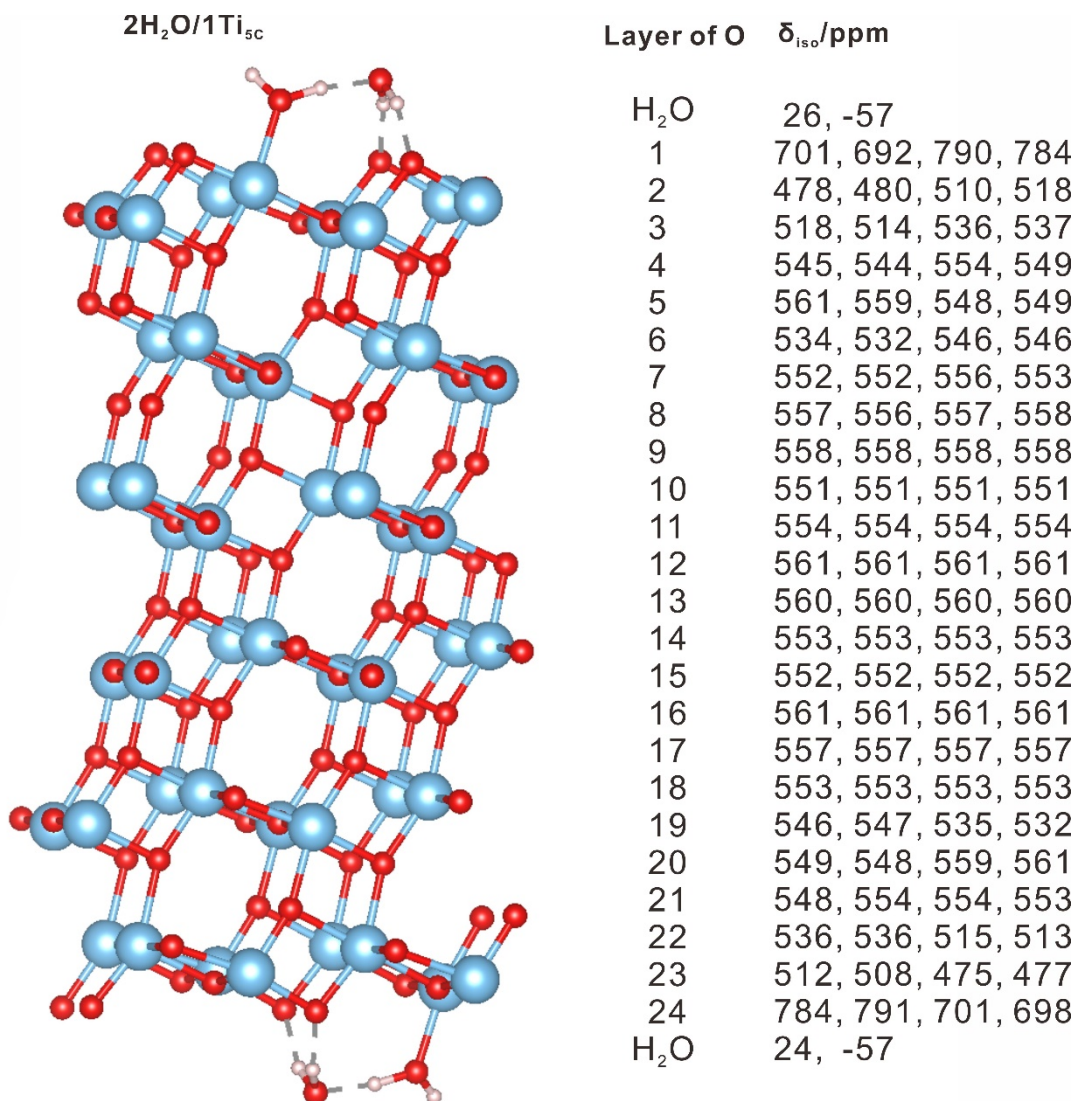

**Figure S15.** Calculated structure of the  $\text{TiO}_2$  (101) facet with adsorbed water molecules. In this model, one water molecule is chemisorbed on one surface  $\text{Ti}_{5\text{C}}$  site and another water molecule is physisorbed on the  $\text{H}_2\text{O}-\text{Ti}_{5\text{C}}$  through hydrogen bond. This structure is denoted as  $2\text{H}_2\text{O}/1\text{Ti}_{5\text{C}}$  in the text. Isotropic chemical shifts  $\delta_{\text{iso}}$  of the oxygen sites in each layer are listed, for which  $\delta_{\text{ref}} = 133$ . Titanium, oxygen and hydrogen atoms are plotted in blue (Ti), red (O) and pink (H).

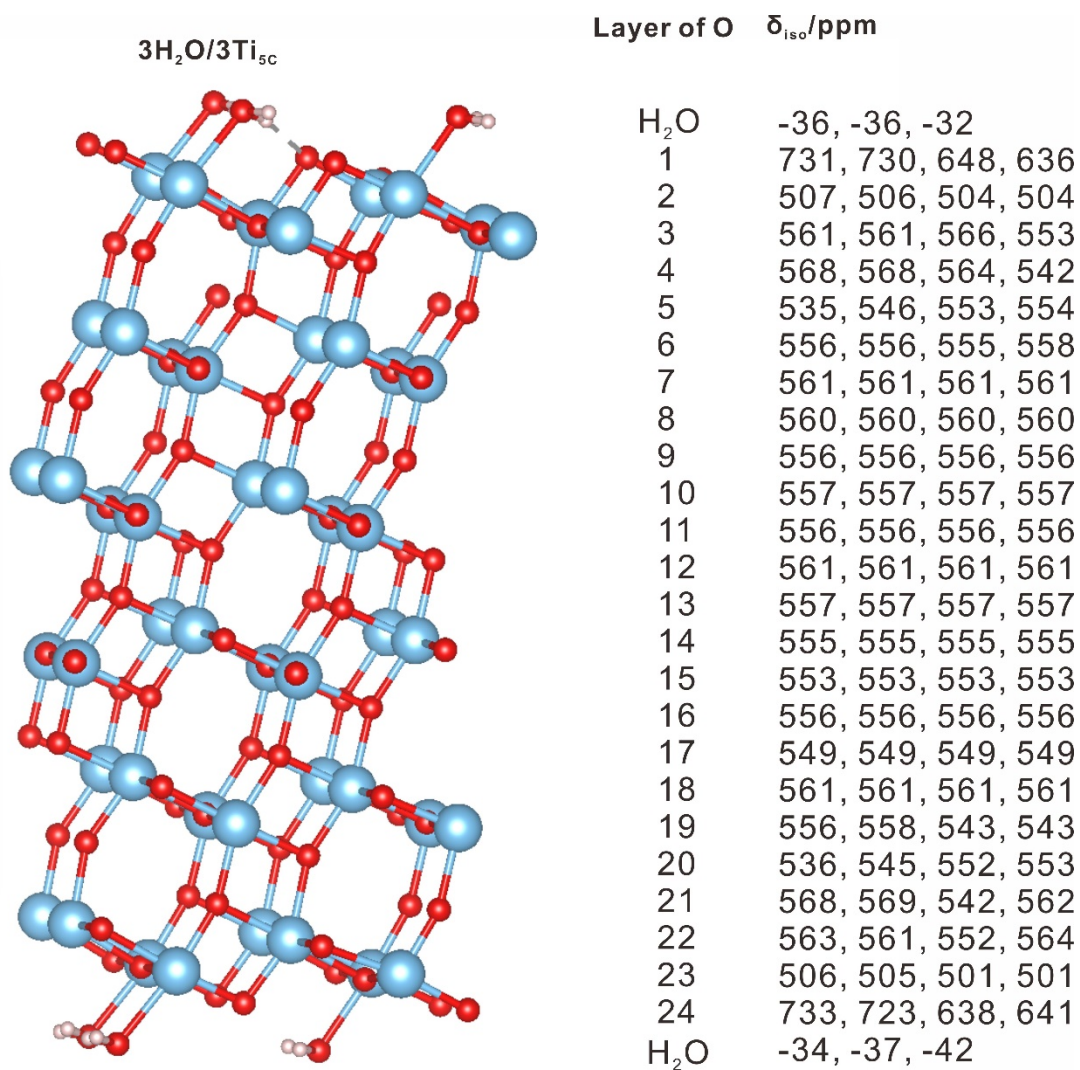

**Figure S16.** Calculated structure of the  $\text{TiO}_2$  (101) facet with adsorbed water molecules. In this model, three water molecules are chemisorbed on three surface  $\text{Ti}_{5\text{C}}$  sites. This structure is denoted as  $3\text{H}_2\text{O}/3\text{Ti}_{5\text{C}}$  in the text. Isotropic chemical shifts  $\delta_{iso}$  of the oxygen sites in each layer are listed, for which  $\delta_{ref} = 133$ . Titanium, oxygen and hydrogen atoms are plotted in blue (Ti), red (O) and pink (H).

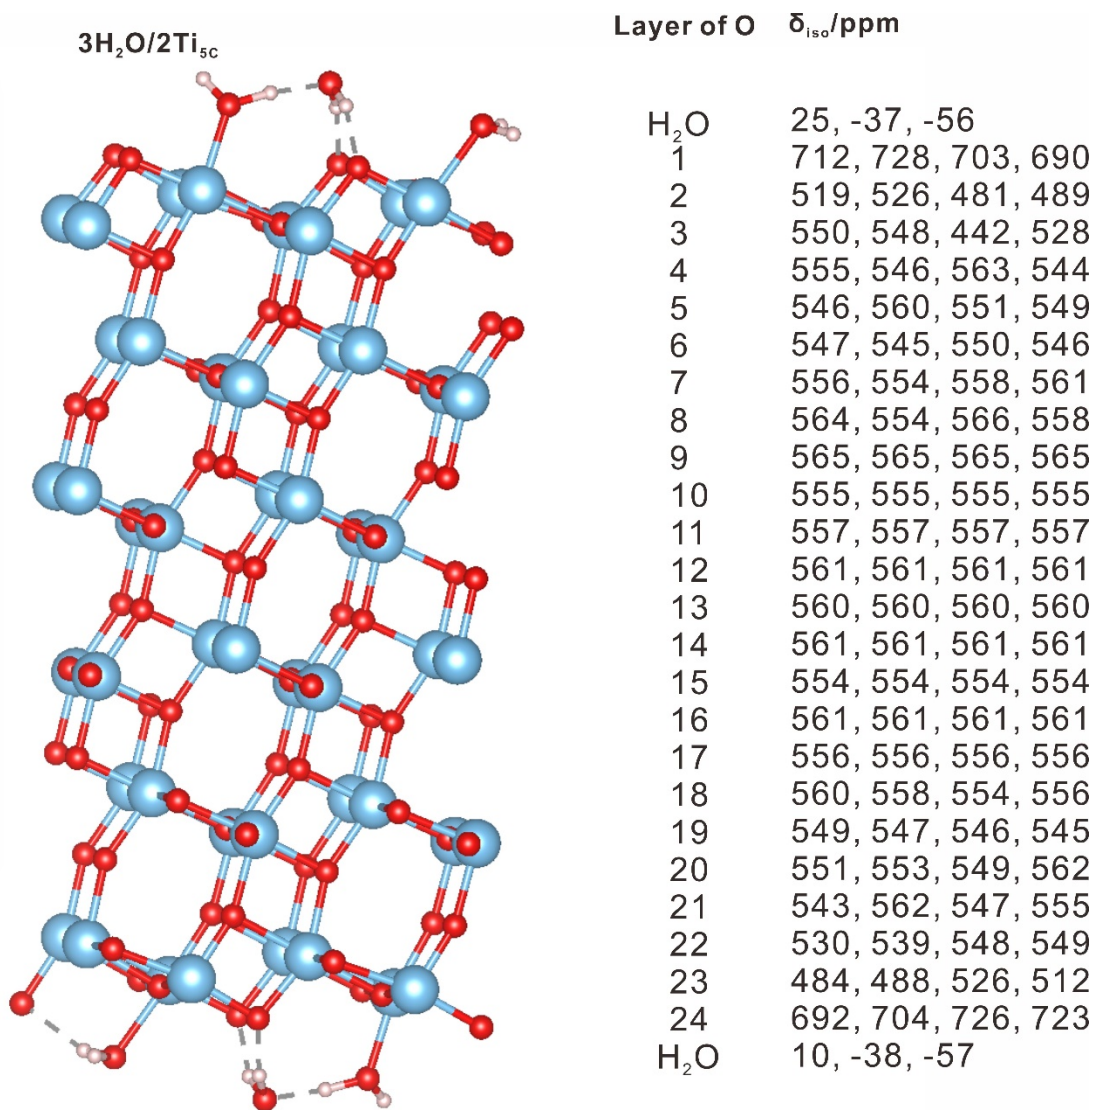

**Figure S17.** Calculated structure of the  $\text{TiO}_2$  (101) facet with adsorbed water molecules. In this model, two water molecules are chemisorbed on two surface  $\text{Ti}_{5\text{C}}$  site and another one water molecule is physisorbed on the  $\text{H}_2\text{O}-\text{Ti}_{5\text{C}}$  through hydrogen bond. This structure is denoted as  $3\text{H}_2\text{O}/2\text{Ti}_{5\text{C}}$  in the text. Isotropic chemical shifts  $\delta_{\text{iso}}$  of the oxygen sites in each layer are listed, for which  $\delta_{\text{ref}} = 135$ . Titanium, oxygen and hydrogen atoms are plotted in blue (Ti), red (O) and pink (H).

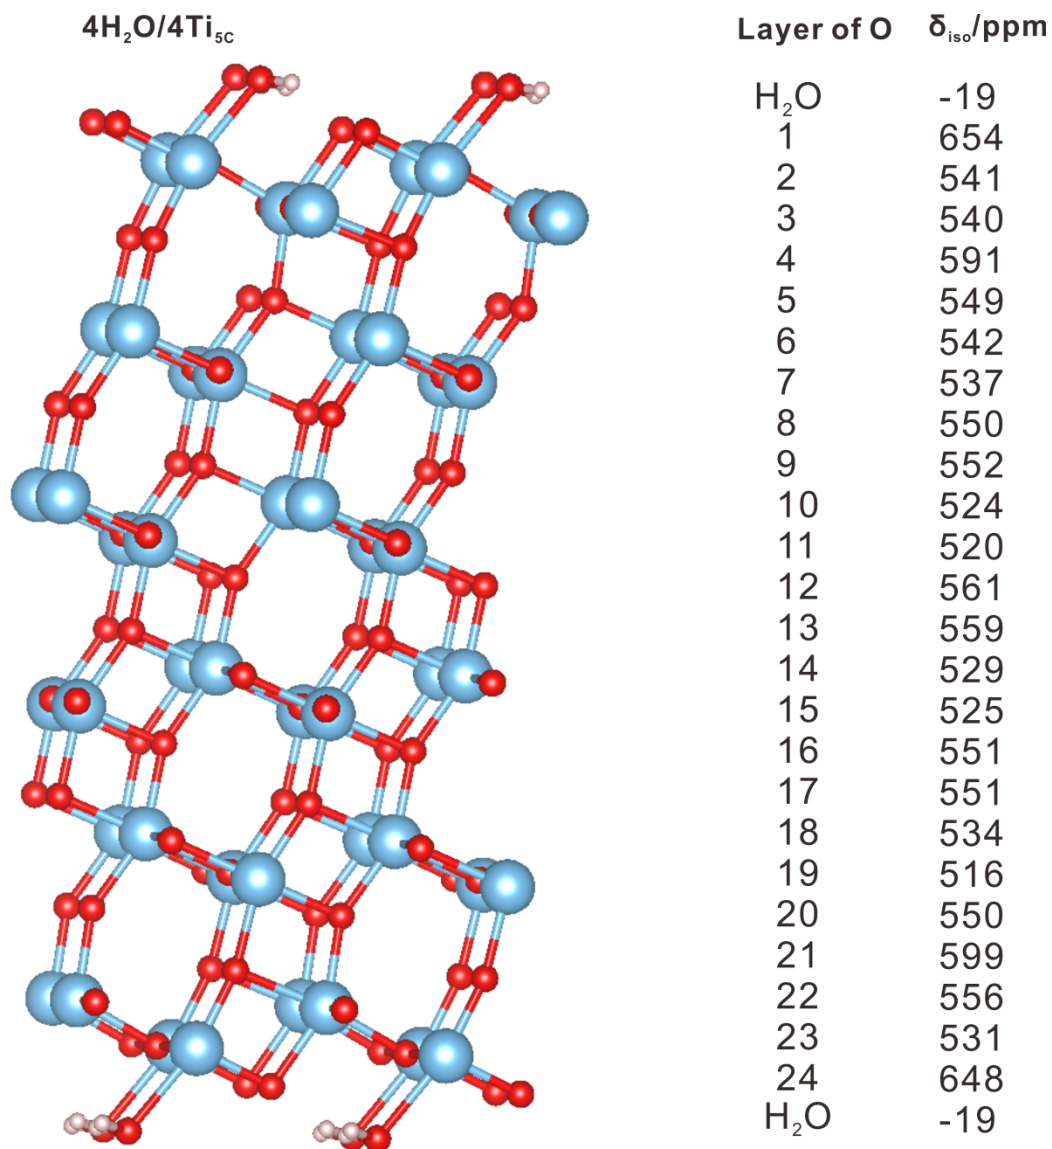

**Figure S18.** Calculated structure of the  $\text{TiO}_2$  (101) facet with adsorbed water molecules. In this model, four water molecules are chemisorbed on four surface  $\text{Ti}_{5\text{C}}$  sites. This structure is denoted as  $4\text{H}_2\text{O}/4\text{Ti}_{5\text{C}}$  in the text. Isotropic chemical shifts  $\delta_{iso}$  of the oxygen sites in each layer are listed, for which  $\delta_{ref} = 132$ . Titanium, oxygen and hydrogen atoms are plotted in blue (Ti), red (O) and pink (H).

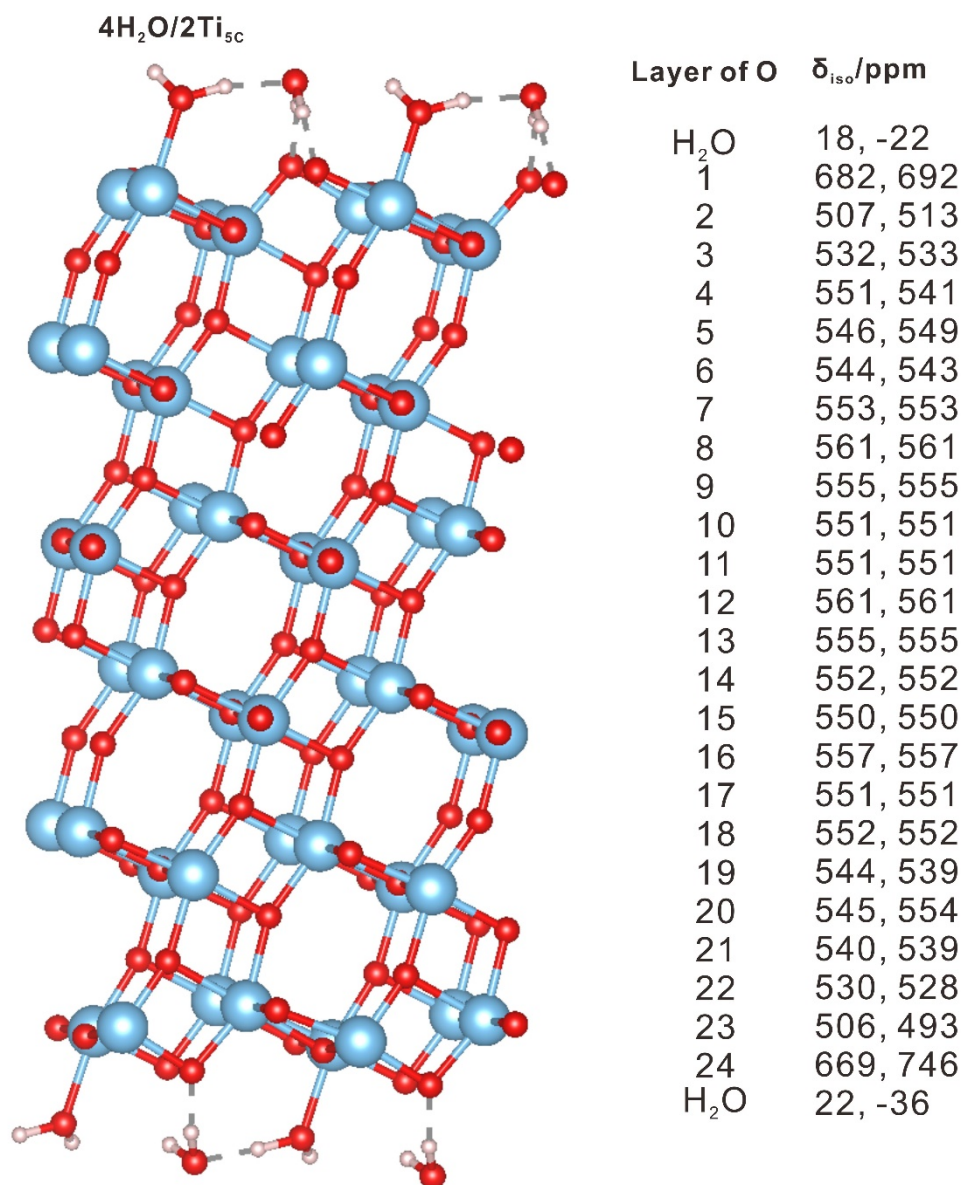

**Figure S19.** Calculated structure of the  $\text{TiO}_2$  (101) facet with adsorbed water molecules. In this model, two water molecules are chemisorbed on two surface  $\text{Ti}_{5\text{C}}$  sites and another two water molecules are physisorbed on the  $\text{H}_2\text{O}-\text{Ti}_{5\text{C}}$  through hydrogen bond. This structure is denoted as  $4\text{H}_2\text{O}/2\text{Ti}_{5\text{C}}$  in the text. Isotropic chemical shifts  $\delta_{\text{iso}}$  of the oxygen sites in each layer are listed, for which  $\delta_{\text{ref}} = 130$ . Titanium, oxygen and hydrogen atoms are plotted in blue (Ti), red (O) and pink (H).

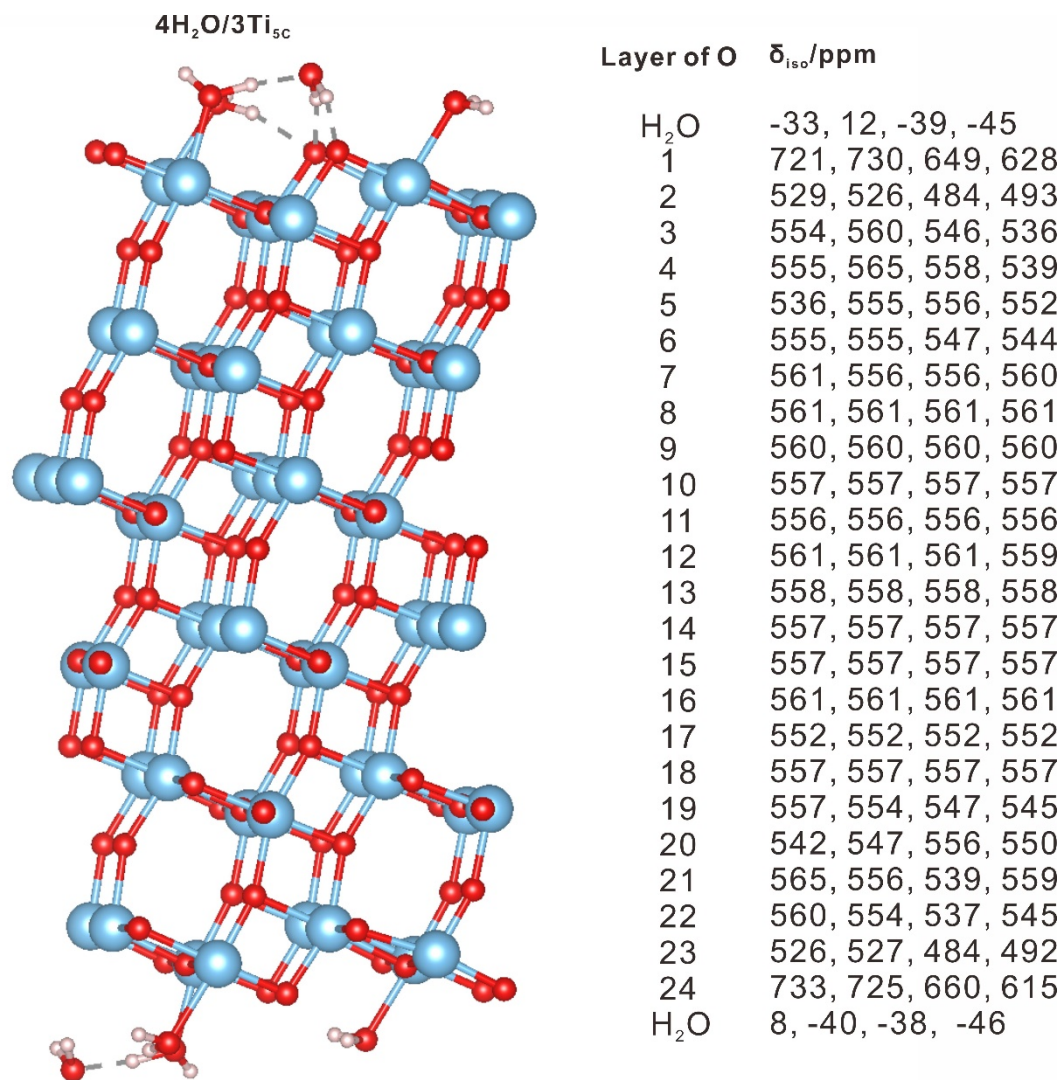

**Figure S20.** Calculated structure of the  $\text{TiO}_2$  (101) facet with adsorbed water molecules. In this model, three water molecules are chemisorbed on three surface  $\text{Ti}_{5\text{C}}$  sites and another water molecule is physisorbed on the  $\text{H}_2\text{O}-\text{Ti}_{5\text{C}}$  through hydrogen bond. This structure is denoted as  $4\text{H}_2\text{O}/3\text{Ti}_{5\text{C}}$  in the text. Isotropic chemical shifts  $\delta_{\text{iso}}$  of the oxygen sites in each layer are listed, for which  $\delta_{\text{ref}} = 133$ . Titanium, oxygen and hydrogen atoms are plotted in blue (Ti), red (O) and pink (H).

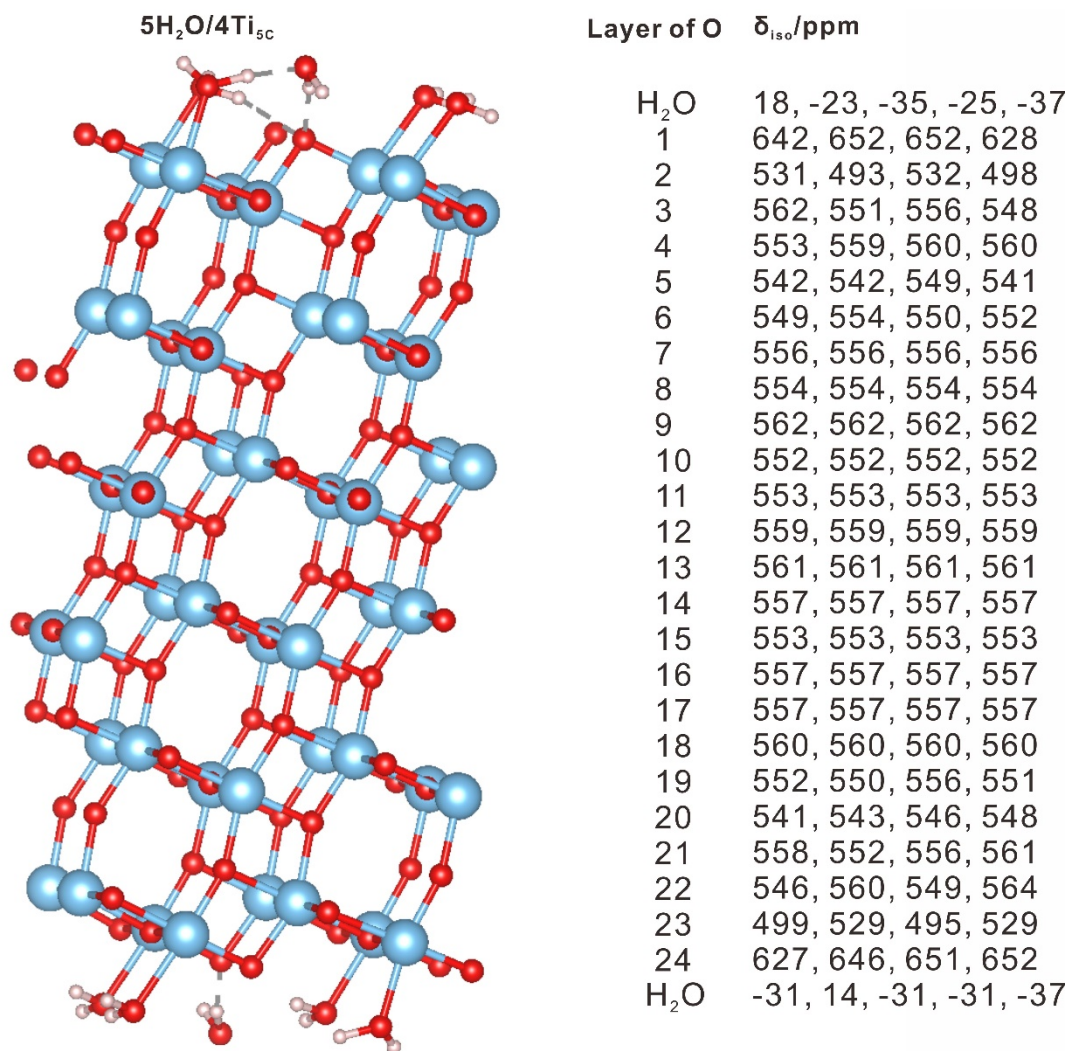

**Figure S21.** Calculated structure of the  $\text{TiO}_2$  (101) facet with adsorbed water molecules. In this model, four water molecules are chemisorbed on four surface  $\text{Ti}_{5\text{C}}$  sites and another one water molecule is physisorbed on the  $\text{H}_2\text{O}-\text{Ti}_{5\text{C}}$  through hydrogen bond. This structure is denoted as  $5\text{H}_2\text{O}/4\text{Ti}_{5\text{C}}$  in the text. Isotropic chemical shifts  $\delta_{\text{iso}}$  of the oxygen sites in each layer are listed, for which  $\delta_{\text{ref}} = 131$ . Titanium, oxygen and hydrogen atoms are plotted in blue (Ti), red (O) and pink (H).



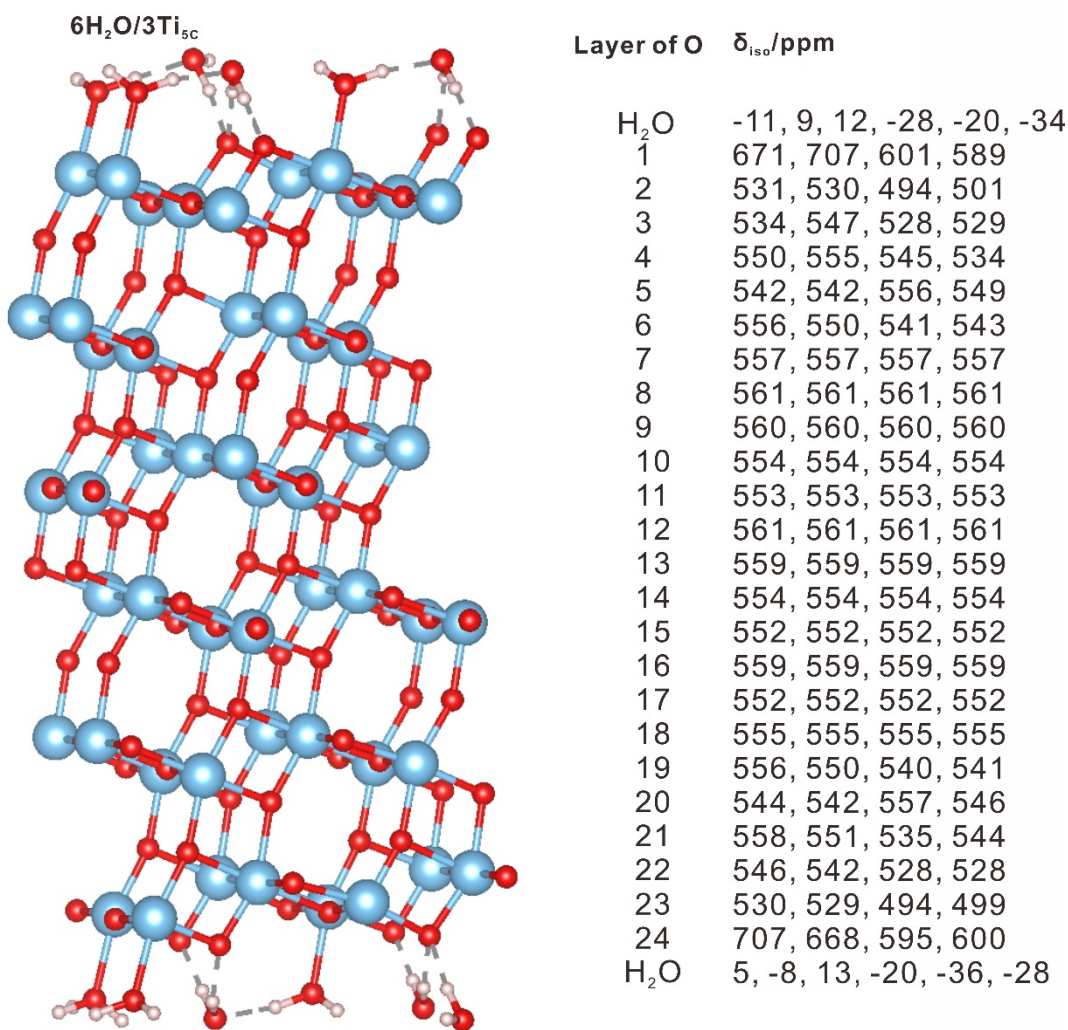

**Figure S22.** Calculated structure of the  $\text{TiO}_2$  (101) facet with adsorbed water molecules. In this model, three water molecules are chemisorbed on three surface  $\text{Ti}_{5\text{C}}$  sites and another three water molecules are physisorbed on the  $\text{H}_2\text{O}-\text{Ti}_{5\text{C}}$  through hydrogen bond. This structure is denoted as  $6\text{H}_2\text{O}/3\text{Ti}_{5\text{C}}$  in the text. Isotropic chemical shifts  $\delta_{iso}$  of the oxygen sites in each layer are listed, for which  $\delta_{ref} = 130$ . Titanium, oxygen and hydrogen atoms are plotted in blue (Ti), red (O) and pink (H).

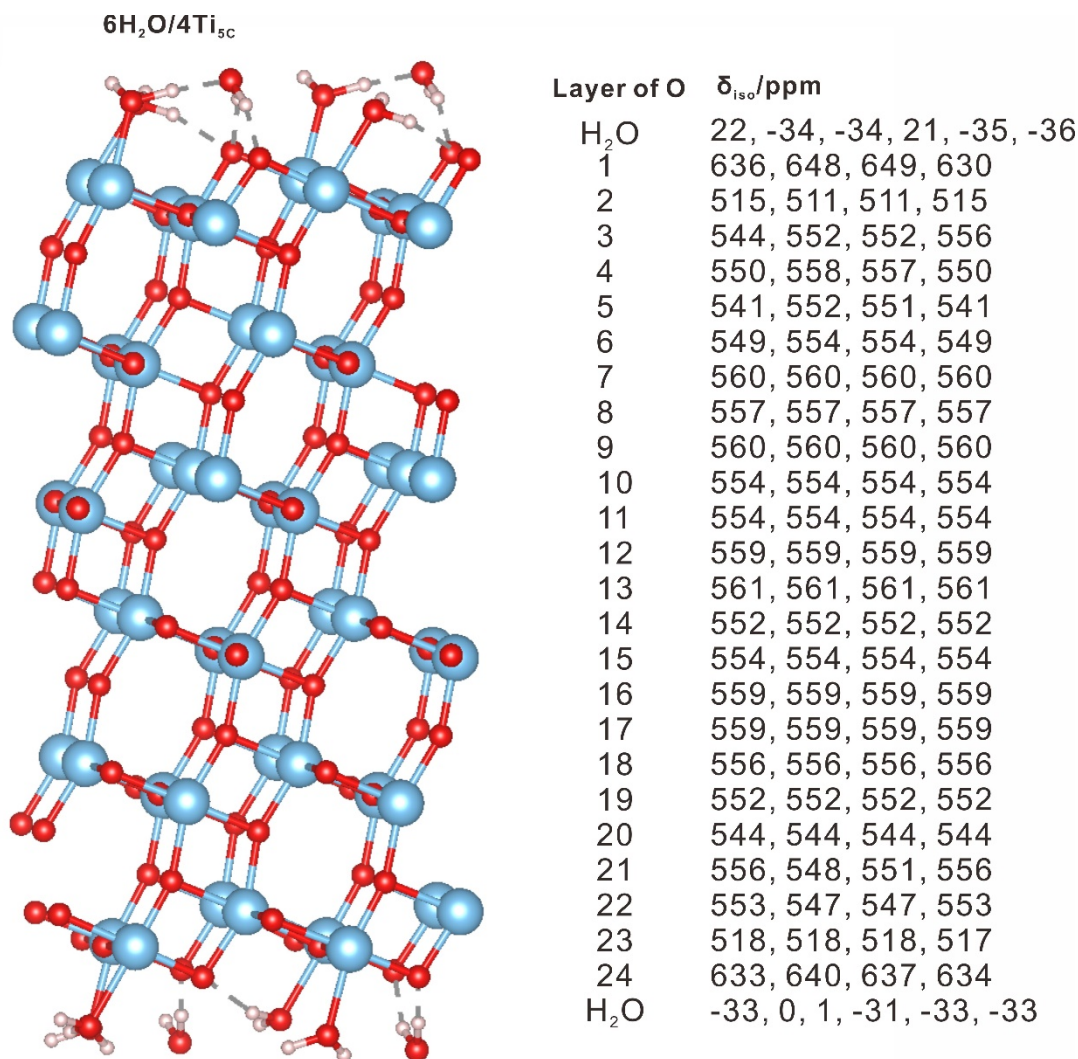

**Figure S23.** Calculated structure of the  $\text{TiO}_2$  (101) facet with adsorbed water molecules. In this model, four water molecules are chemisorbed on four surface  $\text{Ti}_{5\text{C}}$  sites and another two water molecules are physisorbed on the  $\text{H}_2\text{O}-\text{Ti}_{5\text{C}}$  through hydrogen bond. This structure is denoted as  $6\text{H}_2\text{O}/4\text{Ti}_{5\text{C}}$  in the text. Isotropic chemical shifts  $\delta_{\text{iso}}$  of the oxygen sites in each layer are listed, for which  $\delta_{\text{ref}} = 132$ . Titanium, oxygen and hydrogen atoms are plotted in blue (Ti), red (O) and pink (H).

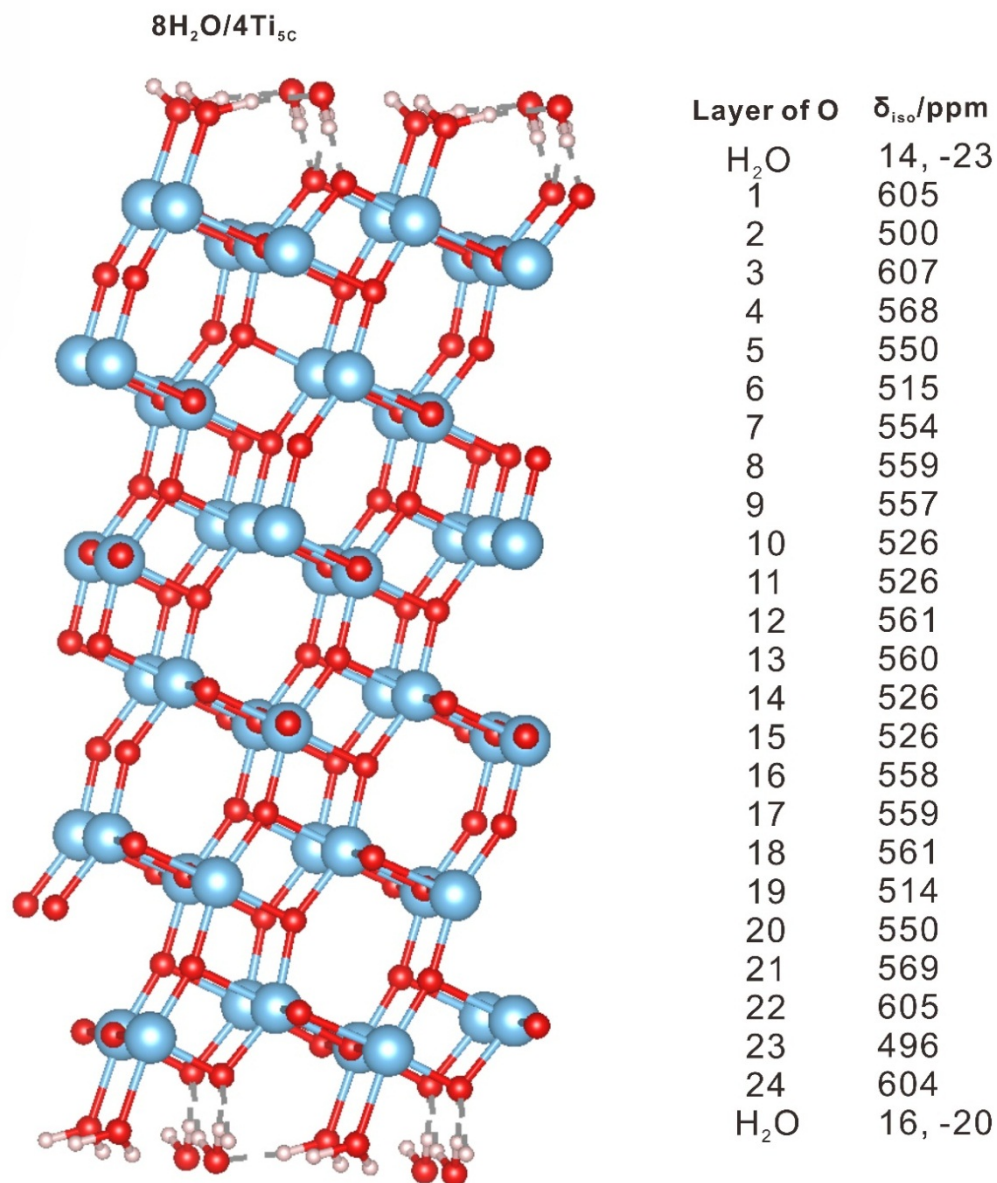

**Figure S24.** Calculated structure of the  $\text{TiO}_2$  (101) facet with adsorbed water molecules. In this model, four water molecules are chemisorbed on four surface  $\text{Ti}_{5\text{C}}$  sites and another four water molecules are physisorbed on the  $\text{H}_2\text{O}-\text{Ti}_{5\text{C}}$  through hydrogen bond. This structure is denoted as  $8\text{H}_2\text{O}/4\text{Ti}_{5\text{C}}$  in the text. Isotropic chemical shifts  $\delta_{\text{iso}}$  of the oxygen sites in each layer are listed, for which  $\delta_{\text{ref}} = 166$ . Titanium, oxygen and hydrogen atoms are plotted in blue (Ti), red (O) and pink (H).

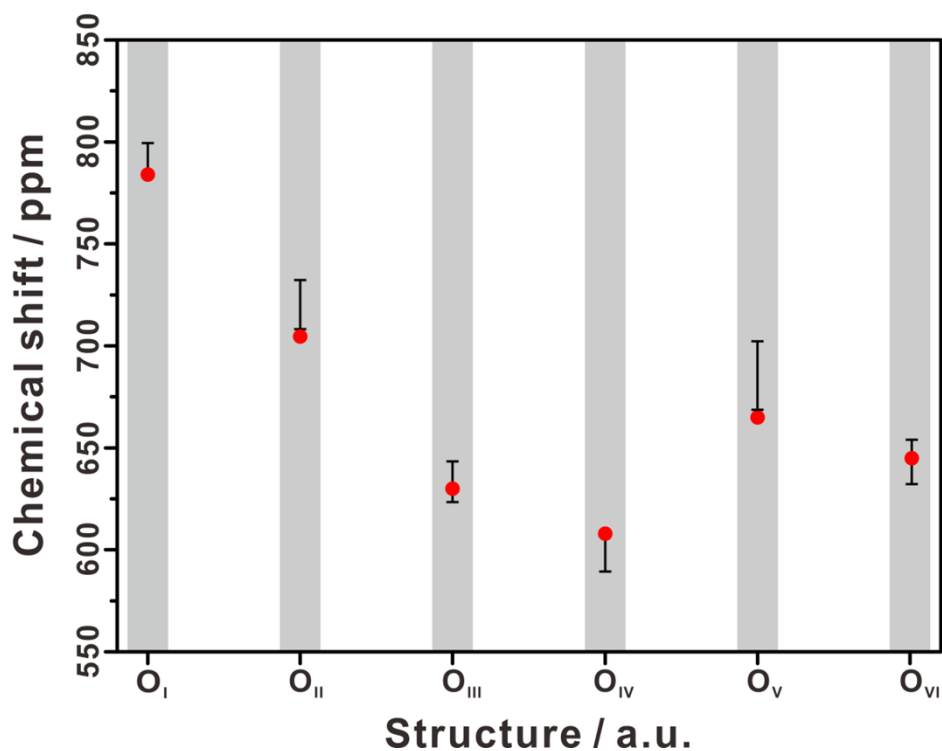

**Figure S25.** Calculated  $^{17}\text{O}$  chemical shifts of various  $\text{O}_{2\text{C}}$  sites interacting with  $\text{H}_2\text{O}$  on (101) facet of  $\text{TiO}_2$  (Bar), and the corresponding NMR experimental values (Red dot). According to our NMR results, two types of adsorbed  $\text{H}_2\text{O}$  (chemisorbed  $\text{H}_2\text{O}$ , i.e.  $\text{Ti}_{5\text{C}}\text{-OH}_2$  and physisorbed  $\text{H}_2\text{O}$ ) are present on the (101) facet of  $\text{TiO}_2$ , and the formation of  $\text{O}_{II}$  –  $\text{O}_{VI}$  sites is associated with the interaction between  $\text{O}_I$  (the bare  $\text{O}_{2\text{C}}$  site) and adsorbed  $\text{H}_2\text{O}$ . Thus, a series of structures with different  $\text{H}_2\text{O}$  adsorption configuration on  $(2 \times 2)$   $\text{TiO}_2$  (101) surface slabs are optimized and shown in Figures S12–S24. Theoretical calculations indicate that the two types of adsorbed  $\text{H}_2\text{O}$  can form hydrogen bonds with nearby  $\text{O}_{2\text{C}}$  sites. Six  $\text{O}_{2\text{C}}$  sites having interaction with  $\text{H}_2\text{O}$  in different adsorption configuration are summarized from the calculated structures on  $(2 \times 2)$  surface slabs (Figure 3b in main text). Based on our theoretically calculated and experimental  $^{17}\text{O}$  NMR chemical shifts (Figure S25), as well as the evolution of surface  $\text{O}_{2\text{C}}$  sites with the increase of  $\text{H}_2\text{O}$  loading (Figure 3a in main text), the following assignments can be made:  $\text{O}_I$  is due to surface  $\text{O}_{2\text{C}}$  site without interaction with  $\text{H}_2\text{O}$ ;  $\text{O}_{II}$  and  $\text{O}_{III}$  correspond to surface  $\text{O}_{2\text{C}}$  sites interacting with one and two chemisorbed  $\text{H}_2\text{O}$ , respectively;  $\text{O}_{IV}$  is assigned to surface  $\text{O}_{2\text{C}}$  site interacting with two chemisorbed  $\text{H}_2\text{O}$  and two physisorbed  $\text{H}_2\text{O}$ ;  $\text{O}_V$  is attributed to surface  $\text{O}_{2\text{C}}$  site interacting with one chemisorbed  $\text{H}_2\text{O}$  and one physisorbed  $\text{H}_2\text{O}$ ;  $\text{O}_{VI}$  is due to surface  $\text{O}_{2\text{C}}$  site interacting with two chemisorbed  $\text{H}_2\text{O}$  and one physisorbed  $\text{H}_2\text{O}$ .

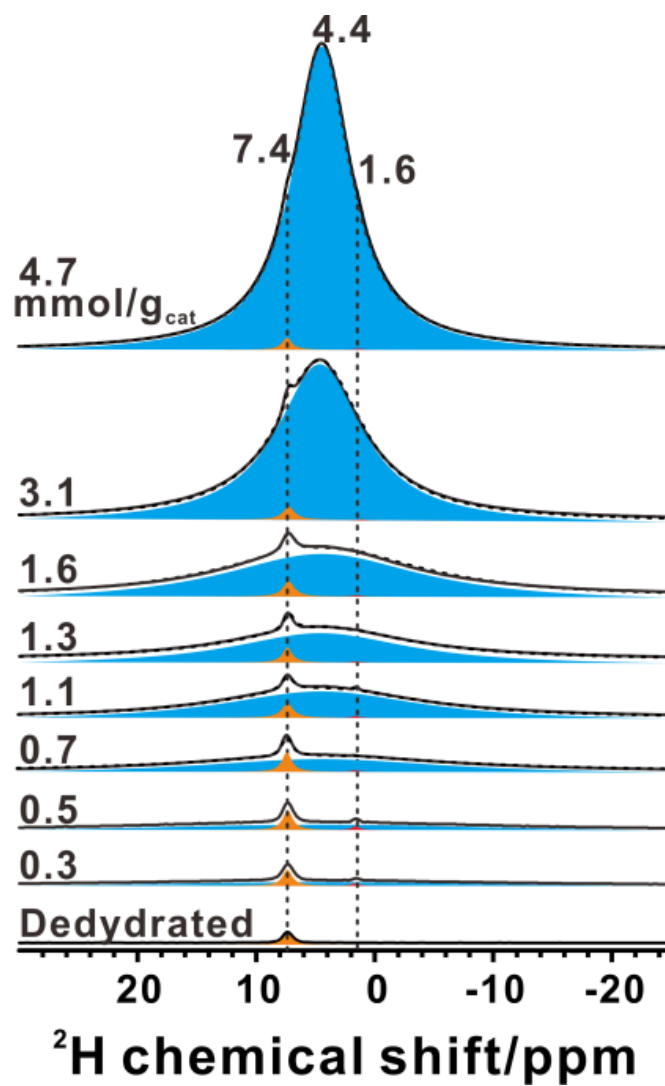

**Figure S26.** Experimental and simulated <sup>2</sup>H MAS NMR spectra of dehydrated <sup>2</sup>H-enriched TiO<sub>2</sub> samples with <sup>2</sup>H<sub>2</sub>O loading from 0 to 4.7 mmol/g.

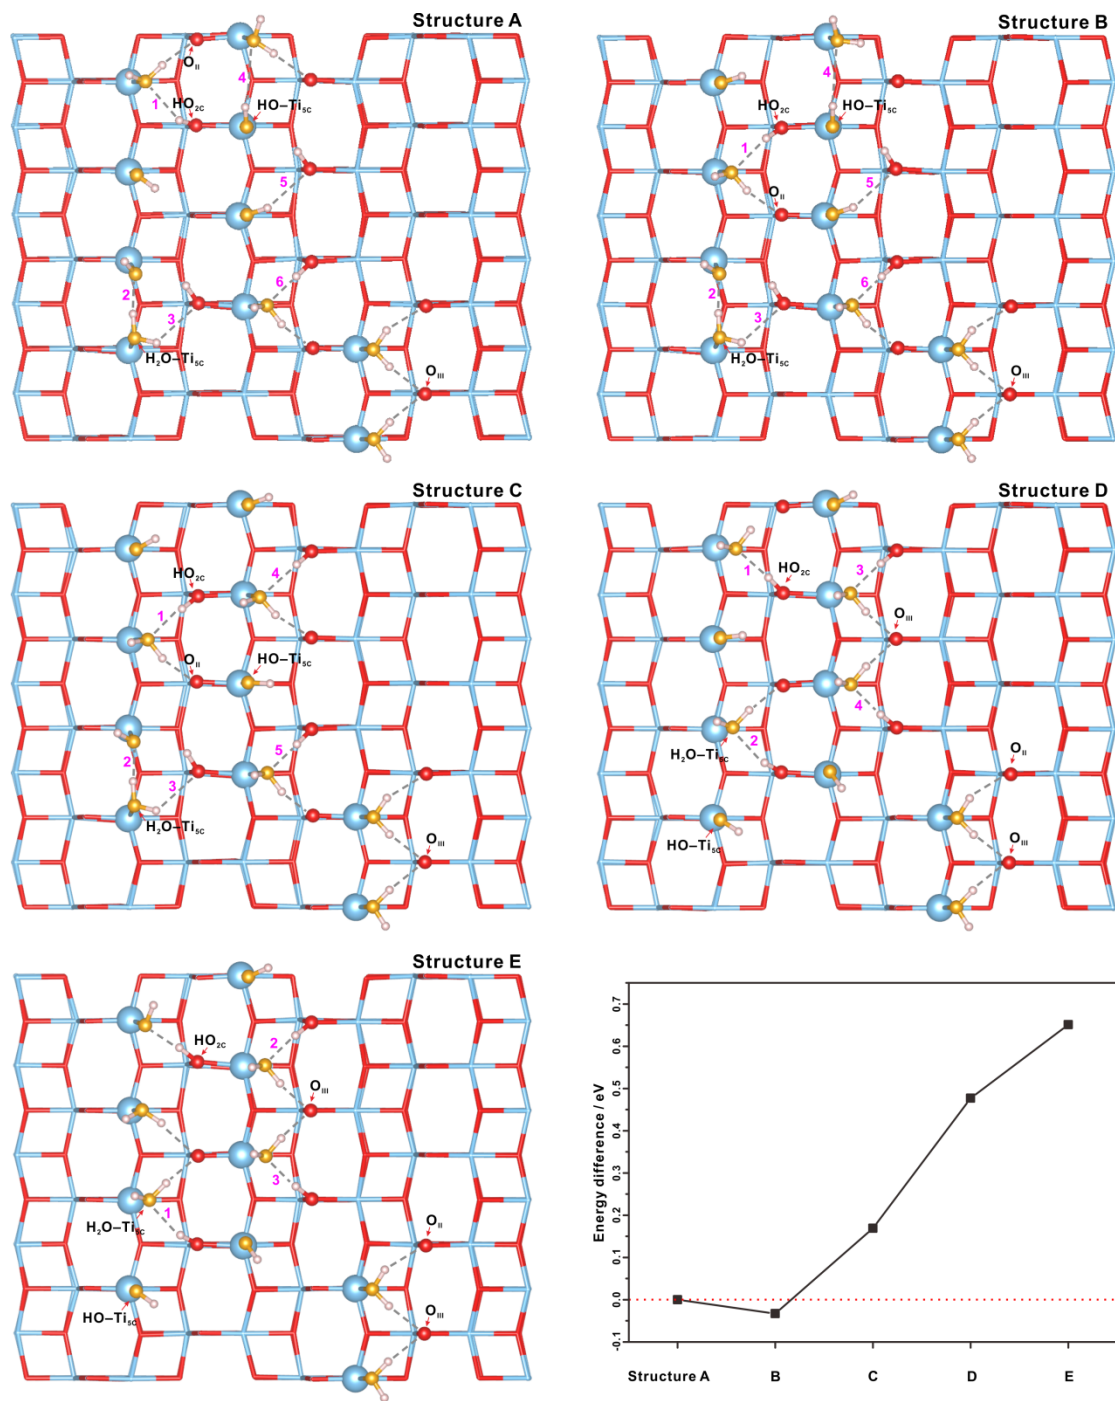

**Figure S27.** The optimized dissociation states of the interfacial H<sub>2</sub>O on the (101) facet of TiO<sub>2</sub> at a 40% coverage with different amount of OH – H<sub>2</sub>O interaction in the form of M<sub>I</sub> – M<sub>VI</sub> conformations (Figure 2 in main text), and the energy difference of the different OH / H<sub>2</sub>O configurations (Structure A with six OH – H<sub>2</sub>O interactions, Structure B with six OH – H<sub>2</sub>O interactions, Structure C with five OH – H<sub>2</sub>O interactions, Structure D with four OH – H<sub>2</sub>O interactions, and Structure E with three OH – H<sub>2</sub>O interactions). To verify the interactions between OH and

H<sub>2</sub>O on anatase TiO<sub>2</sub> (101) surface, we performed structure optimization of five geometries with OH species (including Ti<sub>5C</sub>-OH and O<sub>2C</sub>H) and H<sub>2</sub>O molecules on TiO<sub>2</sub> (101) surface. The calculations were performed by using a large (5×5×1) supercell slab (a=b=27.21 Å) with 300 atoms (100 Ti atoms and 200 O atoms) containing a vacuum gap of 15 Å. With such a big supercell, we use gamma point only to sample the surface Brillouin zone. The OH species and H<sub>2</sub>O molecules were put on one side of the supercell and the atoms in the most bottom layer atoms were fixed during the calculations. With the increase of the OH – H<sub>2</sub>O interactions, the energy of the OH/H<sub>2</sub>O configurations decrease gradually, indicating that the OH – H<sub>2</sub>O interactions can stabilize the dissociation of H<sub>2</sub>O, and hinder the reaction of bridging OH groups and adjacent terminal OH groups to regenerate molecular H<sub>2</sub>O.

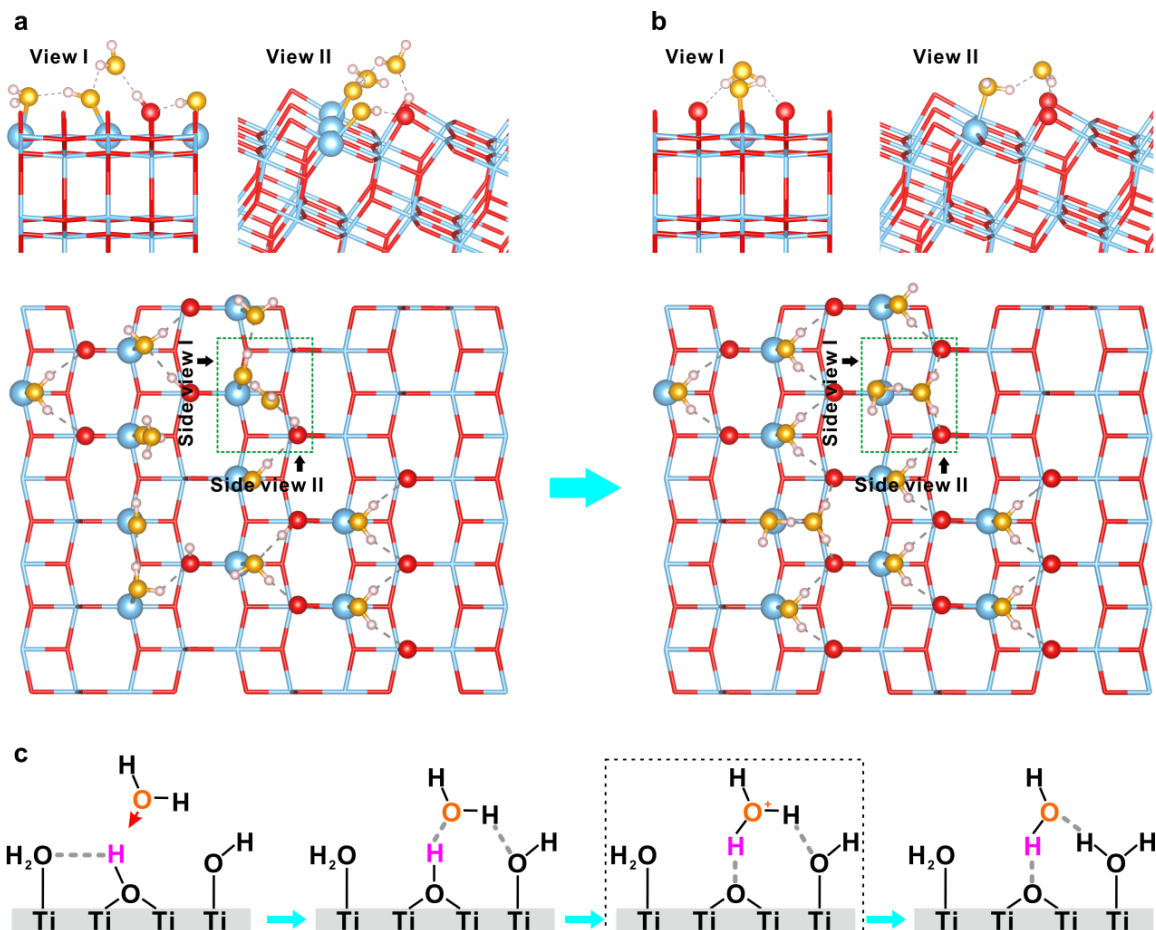

**Figure S28.** (a) The dissociation state of interfacial H<sub>2</sub>O on the (101) facet of TiO<sub>2</sub> at a 65% coverage of water. In this model, the physisorbed H<sub>2</sub>O is shown in the green square. (b) The molecular H<sub>2</sub>O adsorbed on the (101) facet of TiO<sub>2</sub> at the 65% coverage of water. (c) Scheme of regenerating H<sub>2</sub>O via the interaction between two OH groups originated from H<sub>2</sub>O dissociation. According to the <sup>2</sup>H MAS NMR results (Figure 4 in main text), the proton of bridging OH group is active and can exchange with <sup>2</sup>H of D<sub>2</sub>O. As such, when the physisorbed H<sub>2</sub>O is adsorbed on the proton of bridged OH group through hydrogen bond, its original interaction with chemisorbed H<sub>2</sub>O is broken, and an H<sub>3</sub>O<sup>+</sup>-like transition state could be formed as revealed in the previous report<sup>11</sup>, which can react with adjacent terminal OH group to re-generate H<sub>2</sub>O.



**Table S1.**  $^{17}\text{O}$  NMR parameters for oxygen sites on  $\text{TiO}_2$  (101) surface.

| O sites          | Experimental results             |                  | Calculated structures                                                                |
|------------------|----------------------------------|------------------|--------------------------------------------------------------------------------------|
|                  | $\delta_{\text{iso}}/\text{ppm}$ | $P_Q/\text{MHz}$ |                                                                                      |
| $\text{O}_I$     | 785 <sup>a</sup>                 | 8.2 <sup>a</sup> | 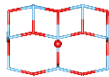  |
| $\text{O}_{II}$  | 702                              | 0.9              |   |
| $\text{O}_{III}$ | 628                              | 0.0              |   |
| $\text{O}_{IV}$  | 615                              | 0.0              |   |
| $\text{O}_V$     | 658                              | 0.4              |   |
| $\text{O}_{VI}$  | 641                              | 0.7              |  |

Isotropic chemical shifts ( $\delta_{\text{iso}}$ ) and quadrupolar parameters ( $P_Q$ ) are derived from the 2D  $^{17}\text{O}$  3Q MAS spectra in Figure 1d and 1E.  $\delta_{\text{iso}} = \frac{17}{27}\delta_{F1} + \frac{10}{27}\delta_{F2}$ ,

$P_Q = \nu_0 \sqrt{\frac{17}{675000}}(\delta_{F1} - \delta_{F2}) = C_Q \times \sqrt{\frac{\eta^2}{3} + 1}$ , where  $\nu_0$  is resonance frequency of oxygen nucleus the  $\eta$  is the asymmetric parameter of the electric field gradient (EFG) tensor.

<sup>a</sup> Extracted by fitting the 1D  $^{17}\text{O}$  MAS spectra in Figure 1c using the Dimfit program. The  $C_Q$  and  $\eta$  of  $\text{O}_I$  is 8.0 MHz and 0.38, respectively.

**Table S2.** Theoretical calculated adsorption energy of H<sub>2</sub>O on TiO<sub>2</sub> with different H<sub>2</sub>O adsorption.  $\Delta E = E(M) - [E(\text{Bare-TiO}_2) + n \times E(\text{H}_2\text{O})]$ , where  $\Delta E$  is the adsorption energy of H<sub>2</sub>O,  $E(M)$  is the total energy of the adsorption complex,  $E(\text{Bare-TiO}_2) = -1266.6306$  eV,  $E(\text{H}_2\text{O}) = -14.209828$  eV, and  $n$  is the number of adsorbed H<sub>2</sub>O.

|                                    |                                     |                                     |                                     |
|------------------------------------|-------------------------------------|-------------------------------------|-------------------------------------|
| 1H <sub>2</sub> O/TiO <sub>2</sub> | 1H <sub>2</sub> O/1Ti <sub>5C</sub> |                                     |                                     |
|                                    | $\Delta E = -15.56$ eV              |                                     |                                     |
| 2H <sub>2</sub> O/TiO <sub>2</sub> | 2H <sub>2</sub> O/1Ti <sub>5C</sub> | 2H <sub>2</sub> O/2Ti <sub>5C</sub> |                                     |
|                                    | $\Delta E = -30.93$ eV              | $\Delta E = -31.59$ eV              |                                     |
| 3H <sub>2</sub> O/TiO <sub>2</sub> | 3H <sub>2</sub> O/2Ti <sub>5C</sub> | 3H <sub>2</sub> O/3Ti <sub>5C</sub> |                                     |
|                                    | $\Delta E = -46.73$ eV              | $\Delta E = -46.82$ eV              |                                     |
| 4H <sub>2</sub> O/TiO <sub>2</sub> | 4H <sub>2</sub> O/2Ti <sub>5C</sub> | 4H <sub>2</sub> O/3Ti <sub>5C</sub> | 4H <sub>2</sub> O/4Ti <sub>5C</sub> |
|                                    | $\Delta E = -62.33$ eV              | $\Delta E = -62.39$ eV              | $\Delta E = -62.78$ eV              |
|                                    |                                     |                                     |                                     |
| 5H <sub>2</sub> O/TiO <sub>2</sub> | 5H <sub>2</sub> O/4Ti <sub>5C</sub> |                                     |                                     |
|                                    | $\Delta E = -77.86$ eV              |                                     |                                     |
| 6H <sub>2</sub> O/TiO <sub>2</sub> | 6H <sub>2</sub> O/3Ti <sub>5C</sub> | 6H <sub>2</sub> O/4Ti <sub>5C</sub> |                                     |
|                                    | $\Delta E = -93.22$ eV              | $\Delta E = -93.44$ eV              |                                     |
| 8H <sub>2</sub> O/TiO <sub>2</sub> | 8H <sub>2</sub> O/4Ti <sub>5C</sub> |                                     |                                     |
|                                    | $\Delta E = -122.37$ eV             |                                     |                                     |

**Note 1:** nH<sub>2</sub>O/TiO<sub>2</sub> represents n H<sub>2</sub>O molecules adsorbed on TiO<sub>2</sub> surface.

**Note 2:** nH<sub>2</sub>O/mTi<sub>5C</sub> (n ≥ m) represents m H<sub>2</sub>O molecules chemisorbed on m Ti<sub>5C</sub> sites (Ti<sub>5C</sub>-OH<sub>2</sub>) of (2 × 2) surface slabs and (n-m) H<sub>2</sub>O molecules physisorbed on (n-m) Ti<sub>5C</sub>-OH<sub>2</sub>.

**Table S3.** The structural parameters (bond length and bond angle) of interfacial H<sub>2</sub>O and TiO<sub>2</sub> framework for the (2 × 2) TiO<sub>2</sub> (101) surface slabs with variable H<sub>2</sub>O adsorption.

|                                         |             |             |             |             |
|-----------------------------------------|-------------|-------------|-------------|-------------|
| <b>1H<sub>2</sub>O/1Ti<sub>5</sub>C</b> |             |             |             |             |
| <p><b>H<sub>2</sub>O-I</b></p>          | <b>D1/Å</b> | <b>D2/Å</b> | <b>A1/°</b> | <b>A2/°</b> |
|                                         | 0.986       | 1.914       | 103.17      | 98.78       |
| <b>2H<sub>2</sub>O/2Ti<sub>5</sub>C</b> |             |             |             |             |
| <p><b>H<sub>2</sub>O-I</b></p>          | <b>D1/Å</b> | <b>D2/Å</b> | <b>A1/°</b> | <b>A2/°</b> |
|                                         | 0.985       | 1.913       | 103.15      | 100.84      |
| <p><b>H<sub>2</sub>O-II</b></p>         | <b>D1/Å</b> | <b>D2/Å</b> | <b>A1/°</b> | <b>A2/°</b> |
|                                         | 0.985       | 1.913       | 103.15      | 100.84      |

**3H<sub>2</sub>O/3Ti<sub>5</sub>C**

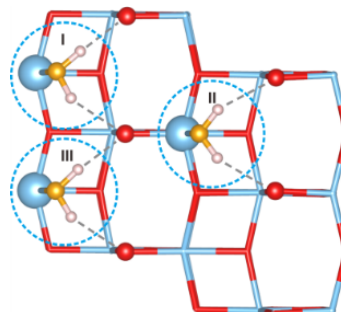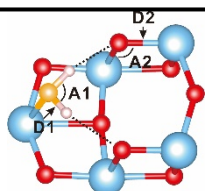

**H<sub>2</sub>O-I**

**D1/Å**

**D2/Å**

**A1/°**

**A2/°**

**0.983**

**1.910**

**103.51**

**101.13**

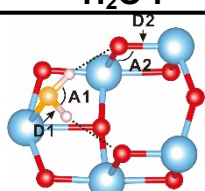

**H<sub>2</sub>O-II**

**D1/Å**

**D2/Å**

**A1/°**

**A2/°**

**0.993**

**1.965**

**101.92**

**99.55**

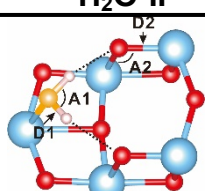

**H<sub>2</sub>O-III**

**D1/Å**

**D2/Å**

**A1/°**

**A2/°**

**0.991**

**1.965**

**101.84**

**99.55**

**4H<sub>2</sub>O/4Ti<sub>5</sub>C**

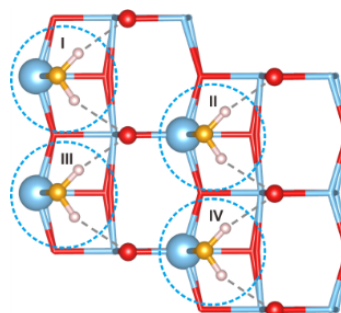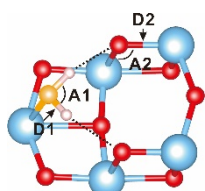

**H<sub>2</sub>O-I**

**D1/Å**

**D2/Å**

**A1/°**

**A2/°**

**0.983**

**2.053**

**101.12**

**98.68**

|                                                                                     |                                                                                     |              |               |               |               |
|-------------------------------------------------------------------------------------|-------------------------------------------------------------------------------------|--------------|---------------|---------------|---------------|
| 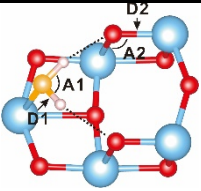   | <b>D1/Å</b>                                                                         | <b>D2/Å</b>  | <b>A1/°</b>   | <b>A2/°</b>   |               |
| <b>H<sub>2</sub>O-II</b>                                                            | <b>0.983</b>                                                                        | <b>2.053</b> | <b>101.12</b> | <b>98.68</b>  |               |
|    | <b>D1/Å</b>                                                                         | <b>D2/Å</b>  | <b>A1/°</b>   | <b>A2/°</b>   |               |
| <b>H<sub>2</sub>O-III</b>                                                           | <b>0.983</b>                                                                        | <b>2.053</b> | <b>101.12</b> | <b>98.68</b>  |               |
|    | <b>D1/Å</b>                                                                         | <b>D2/Å</b>  | <b>A1/°</b>   | <b>A2/°</b>   |               |
| <b>H<sub>2</sub>O-IV</b>                                                            | <b>0.983</b>                                                                        | <b>2.053</b> | <b>101.12</b> | <b>98.68</b>  |               |
| <b>5H<sub>2</sub>O/4Ti<sub>5</sub>C</b>                                             |  |              |               |               |               |
|  | <b>D1/Å</b>                                                                         | <b>D2/Å</b>  | <b>A1/°</b>   | <b>A1'/°</b>  | <b>A2/°</b>   |
| <b>H<sub>2</sub>O-I</b>                                                             | <b>1.045</b>                                                                        | <b>1.938</b> | <b>107.95</b> | <b>102.80</b> | <b>100.57</b> |
|  | <b>D1/Å</b>                                                                         | <b>D2/Å</b>  | <b>A1/°</b>   | <b>A2/°</b>   |               |
| <b>H<sub>2</sub>O-II</b>                                                            | <b>0.996</b>                                                                        | <b>1.937</b> | <b>102.55</b> | <b>99.63</b>  |               |
|  | <b>D1/Å</b>                                                                         | <b>D2/Å</b>  | <b>A1/°</b>   | <b>A2/°</b>   |               |
| <b>H<sub>2</sub>O-III</b>                                                           | <b>0.989</b>                                                                        | <b>1.938</b> | <b>104.51</b> | <b>100.57</b> |               |

|                                                                                                                      |              |                                                                                    |               |               |              |
|----------------------------------------------------------------------------------------------------------------------|--------------|------------------------------------------------------------------------------------|---------------|---------------|--------------|
| 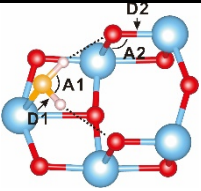 <p><b>H<sub>2</sub>O-IV</b></p>    | <b>D1/Å</b>  | <b>D2/Å</b>                                                                        | <b>A1/°</b>   | <b>A2/°</b>   |              |
|                                                                                                                      | <b>0.991</b> | <b>1.937</b>                                                                       | <b>102.66</b> | <b>99.63</b>  |              |
| <p><b>6H<sub>2</sub>O/4Ti<sub>5</sub>C</b></p>                                                                       |              |  |               |               |              |
|  <p><b>H<sub>2</sub>O-I</b></p>     | <b>D1/Å</b>  | <b>D2/Å</b>                                                                        | <b>A1/°</b>   | <b>A1'/°</b>  | <b>A2/°</b>  |
|                                                                                                                      | <b>1.049</b> | <b>1.934</b>                                                                       | <b>102.75</b> | <b>102.72</b> | <b>99.44</b> |
|  <p><b>H<sub>2</sub>O-II</b></p>   | <b>D1/Å</b>  | <b>D2/Å</b>                                                                        | <b>A1/°</b>   | <b>A2/°</b>   |              |
|                                                                                                                      | <b>0.994</b> | <b>1.934</b>                                                                       | <b>104.70</b> | <b>99.44</b>  |              |
|  <p><b>H<sub>2</sub>O-III</b></p> | <b>D1/Å</b>  | <b>D2/Å</b>                                                                        | <b>A1/°</b>   | <b>A2/°</b>   |              |
|                                                                                                                      | <b>0.994</b> | <b>1.934</b>                                                                       | <b>104.70</b> | <b>99.44</b>  |              |
|  <p><b>H<sub>2</sub>O-IV</b></p>  | <b>D1/Å</b>  | <b>D2/Å</b>                                                                        | <b>A1/°</b>   | <b>A1'/°</b>  | <b>A2/°</b>  |
|                                                                                                                      | <b>1.049</b> | <b>1.934</b>                                                                       | <b>102.75</b> | <b>102.72</b> | <b>99.44</b> |

8H<sub>2</sub>O/4Ti<sub>5</sub>C

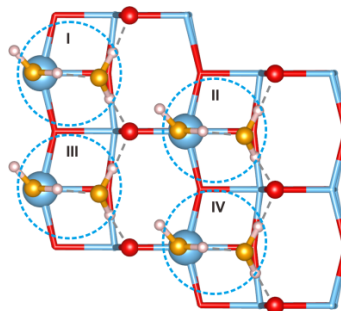

**D1/Å**      **D2/Å**      **A1/°**      **A1'/°**      **A2/°**

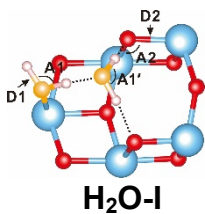

**1.022**      **1.971**      **107.82**      **101.71**      **101.69**

**D1/Å**      **D2/Å**      **A1/°**      **A1'/°**      **A2/°**

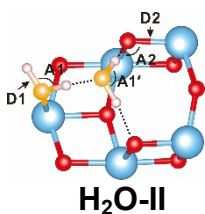

**1.022**      **1.971**      **107.82**      **101.71**      **101.69**

**D1/Å**      **D2/Å**      **A1/°**      **A1'/°**      **A2/°**

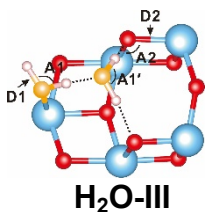

**1.022**      **1.971**      **107.82**      **101.71**      **101.69**

**D1/Å**      **D2/Å**      **A1/°**      **A1'/°**      **A2/°**

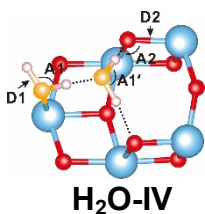

**1.022**      **1.971**      **107.82**      **101.71**      **101.69**

**Table S4.**  $^2\text{H}$  NMR parameters for chemisorbed  $\text{D}_2\text{O}$  on  $\text{TiO}_2$  (101) surface. Isotropic chemical shifts ( $\delta_{\text{iso}}$ ) and quadrupolar parameters ( $C_Q$  and  $\eta$ ) are extracted by spectral fitting of variable-temperature static  $^2\text{H}$  NMR spectra using the Dimfit program.

| Temperature/K | $\delta_{\text{iso}}$ /ppm | $C_Q$ /kHz | $\eta$ |
|---------------|----------------------------|------------|--------|
| 150           | 4.8                        | 209        | 0.1    |
| 180           | 4.8                        | 205        | 0.1    |
| 200           | 4.8                        | 190        | 0.1    |
| 220           | 4.8                        | 150        | 0.1    |

### SI References

- 1 L. Liu, X. Gu, Z. Ji, W. Zou, C. Tang, F. Gao and L. Dong, Anion-Assisted Synthesis of  $\text{TiO}_2$  Nanocrystals with Tunable Crystal Forms and Crystal Facets and Their Photocatalytic Redox Activities in Organic Reactions, *J. Phys. Chem. C*, 2013, **117**, 18578–18587.
- 2 A. Jia, Y. Zhang, T. Song, Z. Zhang, C. Tang, Y. Hu, W. Zheng, M. Luo, J. Lu and W. Huang, Crystal-plane effects of anatase  $\text{TiO}_2$  on the selective hydrogenation of crotonaldehyde over Ir/ $\text{TiO}_2$  catalysts, *J. Catal.*, 2021, **395**, 10–22.
- 3 G. Kresse and J. Furthmüller, Efficiency of ab-initio total energy calculations for metals and semiconductors using a plane-wave basis set, *Comp. Mater. Sci.*, 1996, **6**, 15–50.
- 4 J. P. Perdew, K. Burke and M. Ernzerhof, Generalized gradient approximation made simple, *Phys. Rev. Lett.*, 1996, **77**, 3865–3868.
- 5 Y. Li, X.-P. Wu, N. Jiang, M. Lin, L. Shen, H. Sun, Y. Wang, M. Wang, X. Ke, Z. Yu, F. Gao, L. Dong, X. Guo, W. Hou, W. Ding, X.-Q. Gong, C. P. Grey and L. Peng, Distinguishing Faceted Oxide Nanocrystals with  $^{17}\text{O}$  Solid-State NMR Spectroscopy, *Nat. Commun.*, 2017, **8**, 581.
- 6 J. K. Burdett, T. Hughbanks, G. J. Miller, J. W. Richardson and J. V. Smith, Structural-electronic relationships in inorganic solids: powder neutron diffraction studies of the rutile and anatase polymorphs of titanium dioxide at 15 and 295 K, *J. Am. Chem. Soc.*, 1987, **109**, 3639–3646.
- 7 D. J. Chadi, Special points for Brillouin-zone integrations, *Phys. Rev. B*, 1977, **16**, 1746–1747.
- 8 J. Yu, J. Low, W. Xiao, P. Zhou and M. Jaroniec, Enhanced photocatalytic  $\text{CO}_2$ -reduction activity of anatase  $\text{TiO}_2$  by co-exposed {001} and {101} facets, *J. Am. Chem. Soc.*, 2014, **136**, 8839–8842.



- 9 C. Xu, W. Yang, Q. Guo, D. Dai, M. Chen and X. Yang, Molecular hydrogen formation from photocatalysis of methanol on anatase-TiO<sub>2</sub>(101), *J. Am. Chem. Soc.*, 2014, **136**, 602-605.
- 10 Q. Han, C. Wu, H. Jiao, R. Xu, Y. Wang, J. Xie, Q. Guo and J. Tang, Rational design of high-concentration Ti<sup>3+</sup> in porous carbon-doped TiO<sub>2</sub> nanosheets for efficient photocatalytic ammonia synthesis, *Adv. Mater.*, 2021, **33**, e2008180.
- 11 L. R. Merte, G. Peng, R. Bechstein, F. Rieboldt, C. A. Farberow, L. C. Grabow, W. Kudernatsch, S. Wendt, E. Lægsgaard, M. Mavrikakis and F. Besenbacher, Water-Mediated Proton Hopping on an Iron Oxide Surface, *Science*, 2012, **336**, 889–893.
